# Supplementary material for: Single-cell co-mapping reveals relationship between chromatin state and gene expression in early zebrafish development
Source: eLife. 2026 Apr 21;15:RP110400. doi: 10.7554/eLife.110400 (PMC13099137; doi:10.7554/eLife.110400)
Supplement: Supplementary file 1. [file elife-110400-supp1.xlsx]

## Sheet: Table-1_cells_by_timepoint
			Experimental batch
sample_type	assay	hour	1	2	3	4	5	6
whole-cell	T-noChIC	10hpf	0	0	0	720	232	867
whole-cell	tChIC_H3K27me3	10hpf	275	820	603	1320	0	0
whole-cell	T-noChIC	12hpf	0	0	0	0	0	0
whole-cell	tChIC_H3K27me3	12hpf	0	0	572	0	0	0		T-noChIC only
whole-cell	T-noChIC	24hpf	0	0	0	577	813	707		whole-cell batches
whole-cell	tChIC_H3K27me3	24hpf	653	1034	691	772	0	0		nuclei batches
whole-cell	T-noChIC	4hpf	0	0	0	96	16	0
whole-cell	tChIC_H3K27me3	4hpf	71	15	428	186	0	0
whole-cell	T-noChIC	6hpf	0	0	0	133	96	122
whole-cell	tChIC_H3K27me3	6hpf	130	240	599	262	0	0
whole-cell	T-noChIC	8hpf	0	0	0	0	0	0
whole-cell	tChIC_H3K27me3	8hpf	0	0	604	0	0	0
nuclei	H3K4me1	4hpf	0	399
nuclei	H3K27me3	6hpf	464	0
nuclei	H3K4me1	6hpf	550	425
nuclei	H3K27me3	8hpf	724	0
nuclei	H3K4me1	8hpf	879	656
nuclei	H3K27me3	10hpf	805	0
nuclei	H3K4me1	10hpf	932	823
nuclei	H3K27me3	12hpf	1079	0
nuclei	H3K4me1	12hpf	1193	907
