# Supplementary material for: Single-cell co-mapping reveals relationship between chromatin state and gene expression in early zebrafish development
Source: eLife. 2026 Apr 21;15:RP110400. doi: 10.7554/eLife.110400 (PMC13099137; doi:10.7554/eLife.110400)
Supplement: Supplementary file 2. [file elife-110400-supp2.xlsx]

## Sheet: Table-2_counts_comparison
	Our study
	whole-cells		nuclei		Farrel et al.,		Wagner et al.,
Timepoint	Counts (median)	Genes (median)	Counts (median)	Genes (median)	Counts (mean)	Genes (mean)	Counts(average UMI per cell)	Genes (average genes per cell)
4 hpf	27017.5	6582.5	2008.5	1086.5	6.250 (4.3 hpf)	2.010 (4.3 hpf)	2255.65	1425
6 hpf	20420.5	5292.5	3555.5	1524	4205	1324	6537.9	2615.63
8 hpf	24303	5758.5	3343.5	1480.5	6267	1573	6.635	2537.3
10 hpf	12442	3894	2732.5	1257	4786	1317	8.221	2522.4
12 hpf	16207.5	4724	2830.5	1229	3739	1144	no data	no data
24 hpf	7406	2607	no data	no data	no data	no data	7119.36	2153.75
