# Supplementary material for: Single-cell co-mapping reveals relationship between chromatin state and gene expression in early zebrafish development
Source: eLife. 2026 Apr 21;15:RP110400. doi: 10.7554/eLife.110400 (PMC13099137; doi:10.7554/eLife.110400)
Supplement: Supplementary file 3. [file elife-110400-supp3.xlsx]

## Sheet: Table-3_differential_H3K27me3_g
CellType	geneID	logFC	logCPM	F	PValue	FDR	logFDR	Symbol	logFC_unsplicedRNA	logFC_splicedRNA
Mid-Hindbrain	ENSDARG00000091241	-3.71653	8.62527	14.9683	0.000127454	0.00186851	2.72851	glt1d1	-0.361993	NA
Mid-Hindbrain	ENSDARG00000076262	-3.57951	10.2434	35.9588	6.8273e-09	5.98152e-07	6.22319	pou3f2b	NA	2.64863
Mid-Hindbrain	ENSDARG00000042032	-3.47653	10.2968	36.7724	4.81431e-09	4.5435e-07	6.34261	pou3f3a	NA	3.80562
Mid-Hindbrain	ENSDARG00000016128	-3.36811	9.05245	20.7704	7.13357e-06	0.000163208	3.78726	ap3m2	0.73937	0.592687
Mid-Hindbrain	ENSDARG00000095896	-3.24186	10.4052	28.5635	2.0665e-07	9.79375e-06	5.00905	pou3f3b	NA	3.65414
Mid-Hindbrain	ENSDARG00000097211	-2.9902	9.10489	17.5081	3.61002e-05	0.000632506	3.19894	CR381647.3	NA	0.284067
Mid-Hindbrain	ENSDARG00000076928	-2.6894	10.0431	13.2071	0.000335492	0.00401644	2.39616	tet2	1.57501	1.96725
Mid-Hindbrain	ENSDARG00000069595	-2.63985	9.23089	11.705	0.000699184	0.00718209	2.14375	si:ch211-214c7.4	0.72773	1.18222
Mid-Hindbrain	ENSDARG00000020149	-2.63799	8.71395	9.59334	0.00208705	0.0170515	1.76824	acoxl	0.860591	NA
Mid-Hindbrain	ENSDARG00000010770	-2.59405	8.90962	13.7403	0.000240925	0.00308303	2.51102	sox19a	NA	1.1606
Mid-Hindbrain	ENSDARG00000062646	-2.59131	10.5651	13.3346	0.000320862	0.00387601	2.41161	tet3	1.62054	1.59429
Mid-Hindbrain	ENSDARG00000077948	-2.55531	9.8079	8.9018	0.00310199	0.0231171	1.63607	usp54a	-0.385537	0.14802
Mid-Hindbrain	ENSDARG00000069251	-2.5153	8.46381	8.40572	0.00393836	0.0279187	1.5541	zpax1	NA	-2.00777
Mid-Hindbrain	ENSDARG00000026395	-2.48476	10.4514	11.9689	0.000640063	0.0067597	2.17007	rfx4	2.45386	2.60041
Mid-Hindbrain	ENSDARG00000033296	-2.37218	8.63034	11.461	0.0007776	0.00765929	2.11581	gpr37b	NA	2.29568
Mid-Hindbrain	ENSDARG00000058115	-2.34866	9.12603	13.7835	0.00023862	0.00308303	2.51102	fgfr2	2.10316	1.70686
Mid-Hindbrain	ENSDARG00000052695	-2.30234	11.314	16.8359	5.77149e-05	0.000937091	3.02822	nr2f1a	2.59857	2.76733
Mid-Hindbrain	ENSDARG00000074815	-2.244	8.6666	8.83088	0.0031344	0.0231171	1.63607	mxra5a	NA	-1.35553
Mid-Hindbrain	ENSDARG00000014420	-2.2399	9.63399	17.4929	3.81645e-05	0.000651133	3.18633	elavl3	1.09108	0.370256
Mid-Hindbrain	ENSDARG00000016788	-2.19921	8.50636	7.16578	0.00772003	0.0455429	1.34158	zeb1a	0.244163	0.577377
Mid-Hindbrain	ENSDARG00000035150	-2.18311	9.98726	13.4581	0.00029514	0.00362327	2.4409	drll.2	-0.868528	NA
Mid-Hindbrain	ENSDARG00000054096	-2.11387	8.51365	7.4609	0.00656744	0.0406427	1.39102	rbm41	0.844949	NA
Mid-Hindbrain	ENSDARG00000093253	-2.08481	8.95318	8.198	0.00442917	0.0301263	1.52105	MFSD3	-0.269081	-0.145225
Mid-Hindbrain	ENSDARG00000007818	-2.0741	8.51954	8.21521	0.00435946	0.0300584	1.52203	palm1b	0.074511	0.32727
Mid-Hindbrain	ENSDARG00000079161	-2.05799	8.76849	9.93207	0.0017458	0.0148936	1.827	bsnb	0.146498	-2.26025
Mid-Hindbrain	ENSDARG00000007277	-2.04408	8.47643	7.13045	0.00786897	0.045877	1.3384	myf5	NA	-4.46457
Mid-Hindbrain	ENSDARG00000103800	-2.04173	9.73612	8.02108	0.00495754	0.0331853	1.47905	prkar1b	0.135666	NA
Mid-Hindbrain	ENSDARG00000014222	-1.98109	8.93884	8.85601	0.00310636	0.0231171	1.63607	zgc:86598	-0.0935778	-0.270233
Mid-Hindbrain	ENSDARG00000111585	-1.96619	8.64812	7.80997	0.0054338	0.0349267	1.45684	CABZ01048666.1	0.664604	1.47196
Mid-Hindbrain	ENSDARG00000063917	-1.95862	10.368	14.3323	0.000193029	0.00267407	2.57283	mt-nd4	NA	-0.227468
Mid-Hindbrain	ENSDARG00000104478	-1.93121	8.88386	10.4417	0.00133776	0.012096	1.91736	cap2	-0.695976	NA
Mid-Hindbrain	ENSDARG00000089701	-1.93048	9.47749	9.4557	0.00229339	0.0183229	1.73701	trabd2a	1.83196	2.41192
Mid-Hindbrain	ENSDARG00000026941	-1.92171	8.77153	11.4447	0.000786218	0.00765929	2.11581	fbxl4	NA	NA
Mid-Hindbrain	ENSDARG00000077284	-1.90043	8.73659	10.2926	0.00144142	0.0127284	1.89523	gdpd5a	-1.03936	NA
Mid-Hindbrain	ENSDARG00000101163	-1.85632	9.01911	12.0367	0.000583739	0.00629604	2.20093	BX001023.2	NA	3.00594
Mid-Hindbrain	ENSDARG00000034344	-1.83276	10.1382	11.8626	0.000670351	0.00693308	2.15907	pcdh19	1.24617	0.95739
Mid-Hindbrain	ENSDARG00000042151	-1.79811	10.9116	7.17766	0.00793026	0.04588	1.33838	skia	0.50768	0.47662
Mid-Hindbrain	ENSDARG00000078717	-1.73276	9.46402	9.74747	0.00196753	0.0165054	1.78237	itga8	-0.943822	-2.62833
Mid-Hindbrain	ENSDARG00000035151	-1.71099	9.96587	9.0231	0.00292189	0.0221711	1.65421	drll.1	NA	-4.13184
Mid-Hindbrain	ENSDARG00000018693	-1.65571	10.1551	8.82436	0.00325938	0.0235486	1.62803	cdh2	1.31066	0.671652
Mid-Hindbrain	ENSDARG00000074526	-1.65192	8.80553	8.20412	0.00439992	0.0300628	1.52197	zbtb16b	1.49224	1.59454
Mid-Hindbrain	ENSDARG00000098612	-1.62749	10.0916	17.7364	3.51706e-05	0.000632234	3.19912	chrm2a	-1.37878	-1.02389
Mid-Hindbrain	ENSDARG00000013207	-1.60971	9.51463	7.21308	0.00763693	0.0454822	1.34216	zeb1b	-0.220117	0.349192
Mid-Hindbrain	ENSDARG00000069981	-1.58028	8.91038	7.98332	0.0049668	0.0331853	1.47905	cspg5a	2.97929	3.02448
Mid-Hindbrain	ENSDARG00000076904	-1.56947	9.0541	9.39312	0.00233997	0.0185516	1.73162	loxl5b	-1.69345	-5.72207
Mid-Hindbrain	ENSDARG00000005092	-1.54559	8.68763	7.39053	0.00682968	0.0417523	1.37932	cep89	0.251256	0.0771393
Mid-Hindbrain	ENSDARG00000003989	-1.49698	9.05653	8.21794	0.0043925	0.0300628	1.52197	crhr1	-1.24341	-2.32259
Mid-Hindbrain	ENSDARG00000031702	-1.4964	9.30871	7.93829	0.00513693	0.0337251	1.47205	prkg1b	-1.11065	NA
Mid-Hindbrain	ENSDARG00000090063	-1.40929	9.02549	7.57258	0.00622096	0.039304	1.40556	fa2h	-4.73727	-3.96142
Mid-Hindbrain	ENSDARG00000097984	-1.40209	11.4063	14.0158	0.0002329	0.00308303	2.51102	BX323067.1	2.47909	NA
Mid-Hindbrain	ENSDARG00000063916	-1.38054	9.93075	7.43913	0.00680485	0.0417523	1.37932	mt-nd4l	NA	-0.231076
Mid-Hindbrain	ENSDARG00000026611	-1.37387	9.37893	7.68139	0.0059087	0.0378057	1.42244	socs3b	-0.877546	-0.666082
Mid-Hindbrain	ENSDARG00000098788	-1.28329	14.4939	11.9879	0.00065353	0.00680572	2.16713	pcdh2g28	0.641607	0.6697
Mid-Hindbrain	ENSDARG00000063911	-1.22624	10.4358	7.30186	0.00738148	0.0442303	1.35428	mt-atp6	NA	-0.166223
Mid-Hindbrain	ENSDARG00000063895	-1.21392	10.8723	7.17723	0.0079293	0.04588	1.33838	mt-nd1	NA	-0.156217
Mid-Hindbrain	ENSDARG00000063910	-1.21056	10.2502	7.67653	0.00601869	0.0383469	1.41627	mt-atp8	NA	-0.391246
Mid-Hindbrain	ENSDARG00000026753	-1.17668	9.65006	7.16511	0.00786217	0.045877	1.3384	grik4	-0.968386	NA
Mid-Hindbrain	ENSDARG00000117549	-1.13722	10.3099	7.11874	0.00813977	0.046557	1.33201	FQ790211.1	-1.72016	NA
Optic_Cup	ENSDARG00000097211	-3.99365	9.08165	19.0816	1.66233e-05	0.000525427	3.27949	CR381647.3	NA	2.45464
Optic_Cup	ENSDARG00000076928	-3.83389	10.0301	17.8626	3.26706e-05	0.00086336	3.06381	tet2	0.542014	0.780426
Optic_Cup	ENSDARG00000037879	-3.41282	8.74856	12.997	0.000352485	0.00557117	2.25405	lfng	0.111592	0.283901
Optic_Cup	ENSDARG00000007277	-3.34513	8.45598	11.2518	0.000868633	0.0115722	1.93658	myf5	-3.18938	-3.89583
Optic_Cup	ENSDARG00000035327	-3.06495	8.61693	9.09068	0.00272892	0.0274939	1.56076	ckma	NA	-1.48227
Optic_Cup	ENSDARG00000035151	-2.91664	9.96395	17.591	3.71371e-05	0.000950239	3.02217	drll.1	NA	-4.09761
Optic_Cup	ENSDARG00000101127	-2.88031	8.29576	8.34444	0.00408256	0.0376062	1.42474	map1lc3b	-1.82675	-0.192738
Optic_Cup	ENSDARG00000062646	-2.86868	10.5665	13.155	0.000350077	0.00557117	2.25405	tet3	0.84834	0.845782
Optic_Cup	ENSDARG00000069595	-2.86241	9.22444	10.0606	0.0016536	0.0187718	1.72649	si:ch211-214c7.4	-0.50232	0.397548
Optic_Cup	ENSDARG00000095635	-2.81694	8.8913	11.6242	0.000720492	0.00992678	2.00319	drll.3	NA	-2.56101
Optic_Cup	ENSDARG00000074815	-2.72818	8.6356	8.73179	0.00330794	0.0325147	1.48792	mxra5a	NA	-3.08956
Optic_Cup	ENSDARG00000035150	-2.39664	9.98646	12.8154	0.000408309	0.00626852	2.20284	drll.2	-0.754075	NA
Optic_Cup	ENSDARG00000030804	-2.19132	8.65999	8.65694	0.00344177	0.0336251	1.47334	fam120b	-0.118227	-0.259255
Optic_Cup	ENSDARG00000093985	-1.95651	8.82169	8.3206	0.00413092	0.0378292	1.42217	si:dkeyp-72a4.1	-0.624789	NA
Optic_Cup	ENSDARG00000013207	-1.93904	9.49695	8.19962	0.00447879	0.04011	1.39675	zeb1b	-1.09499	-0.00677352
Optic_Cup	ENSDARG00000078567	-1.84263	10.238	14.207	0.000204312	0.0037879	2.4216	lonrf1l	-0.0660742	0.0413246
Optic_Cup	ENSDARG00000039647	-1.8242	9.35069	11.9478	0.000620492	0.00869768	2.0606	slc6a1b	NA	NA
Optic_Cup	ENSDARG00000097984	-1.82347	11.399	19.1269	1.89643e-05	0.00056612	3.24709	BX323067.1	1.33467	NA
Optic_Cup	ENSDARG00000037889	-1.78319	9.12041	9.21359	0.00257978	0.0263203	1.57971	wnt9b	NA	-2.96721
Optic_Cup	ENSDARG00000069808	-1.78021	9.24317	10.1978	0.00153978	0.017857	1.74819	ostm1	NA	-1.37048
Optic_Cup	ENSDARG00000098788	-1.68397	14.4976	16.5677	6.7033e-05	0.00144076	2.84141	pcdh2g28	-1.17414	-1.0548
Optic_Cup	ENSDARG00000033498	-1.66597	8.98888	7.79532	0.00551071	0.0480177	1.3186	rorb	5.159	NA
Optic_Cup	ENSDARG00000098612	-1.64226	10.0694	14.7149	0.000157139	0.00308913	2.51016	chrm2a	-3.38987	-1.14146
Optic_Cup	ENSDARG00000077852	-1.62848	9.42774	8.32113	0.00419353	0.0379774	1.42048	samd11	1.0162	1.43565
Optic_Cup	ENSDARG00000054879	-1.61146	10.199	13.1299	0.000351583	0.00557117	2.25405	six3b	NA	2.13955
Optic_Cup	ENSDARG00000063916	-1.59316	9.90301	8.35704	0.0041537	0.0378292	1.42217	mt-nd4l	NA	0.554365
Optic_Cup	ENSDARG00000031098	-1.47116	10.1248	9.13995	0.00275597	0.027594	1.55919	timm50	-0.241797	0.554922
Optic_Cup	ENSDARG00000117549	-1.45869	10.3022	9.40126	0.00240993	0.0253909	1.59532	FQ790211.1	-1.10542	NA
Optic_Cup	ENSDARG00000042277	-1.42397	10.9088	8.53676	0.00383368	0.036151	1.44188	efnb3b	1.24915	1.05748
Optic_Cup	ENSDARG00000018025	-1.35612	11.0623	10.7626	0.00120212	0.0145701	1.83654	tbx2a	NA	3.49051
Optic_Cup	ENSDARG00000005574	-1.33833	10.3001	8.6267	0.00362755	0.0350156	1.45574	vsx2	NA	5.40134
Optic_Cup	ENSDARG00000103379	-1.21548	11.661	10.9347	0.00110699	0.0138047	1.85997	pax6a	1.77363	2.34148
Optic_Cup	ENSDARG00000031222	-1.13323	10.8095	8.46133	0.00398596	0.0371409	1.43015	lhx2b	0.780112	1.24278
Optic_Cup	ENSDARG00000051748	-1.03178	11.1256	8.52489	0.00386534	0.0362263	1.44098	ccnd2a	-0.749628	0.0844725
Periderm	ENSDARG00000037362	-5.11236	9.35123	20.053	1.07805e-05	0.000627425	3.20244	scube2	-4.22223	-3.33904
Periderm	ENSDARG00000079912	-4.99501	9.26436	15.8644	8.5244e-05	0.00291835	2.53486	rapgefl1	0.621952	1.71103
Periderm	ENSDARG00000016526	-4.70487	10.9774	30.3724	9.60554e-08	1.63835e-05	4.78559	gata3	0.518968	-0.239361
Periderm	ENSDARG00000035151	-4.67243	9.92714	20.0367	1.14527e-05	0.000633456	3.19828	drll.1	NA	-4.10272
Periderm	ENSDARG00000098874	-4.6564	10.4009	16.733	5.89772e-05	0.00234032	2.63072	exoc6b	-0.216427	0.470339
Periderm	ENSDARG00000056438	-4.58837	9.02315	16.1994	7.04662e-05	0.0025109	2.60017	her9	0.718897	0.761325
Periderm	ENSDARG00000042329	-4.58806	8.99112	15.4587	0.000102413	0.00313707	2.50348	BCR	-0.524112	-1.09694
Periderm	ENSDARG00000013443	-4.57544	8.96518	11.7413	0.000686813	0.0101625	1.993	atp6v1ba	0.201855	-0.549167
Periderm	ENSDARG00000004318	-4.55951	9.02844	13.6343	0.000258721	0.00564659	2.24821	cbwd	NA	NA
Periderm	ENSDARG00000015922	-4.53386	8.94195	10.6365	0.00122076	0.014599	1.83568	stk17al	2.75496	2.9752
Periderm	ENSDARG00000030326	-4.48735	8.96432	9.99048	0.00171274	0.0176949	1.75215	efna1a	-0.617831	1.08423
Periderm	ENSDARG00000076472	-4.47413	8.94887	17.1133	4.42458e-05	0.00193133	2.71414	ovol1a	2.72107	3.71721
Periderm	ENSDARG00000019845	-4.45734	8.96286	15.3532	0.000107362	0.00317718	2.49796	pdlim1	-0.920365	-0.654217
Periderm	ENSDARG00000078741	-4.44521	8.91063	12.9323	0.000369575	0.00714037	2.14628	FRMD1	1.01744	-0.389507
Periderm	ENSDARG00000008886	-4.37507	8.89364	15.4401	0.000102377	0.00313707	2.50348	msx1b	NA	1.27023
Periderm	ENSDARG00000045893	-4.36402	8.88556	15.6055	9.41023e-05	0.00298732	2.52472	kctd15a	-2.49273	-1.08884
Periderm	ENSDARG00000074910	-4.34674	8.891	13.0826	0.000340947	0.00692202	2.15977	crtc2	NA	0.0675788
Periderm	ENSDARG00000079608	-4.34052	8.84632	11.8162	0.000656357	0.00999585	2.00018	SGPP2	4.10496	3.52533
Periderm	ENSDARG00000006514	-4.26453	8.83735	12.5583	0.000445813	0.00802464	2.09557	her6	NA	-0.646144
Periderm	ENSDARG00000044803	-4.264	8.81201	13.5267	0.000270662	0.00577909	2.23814	dhrs3b	-0.834565	-1.41271
Periderm	ENSDARG00000095635	-4.24446	8.85234	11.4092	0.000809339	0.0112151	1.9502	drll.3	NA	-4.43768
Periderm	ENSDARG00000070162	-4.23244	8.77771	11.5617	0.00074737	0.010696	1.97078	stox2a	-1.064	0.835095
Periderm	ENSDARG00000068562	-4.2165	8.80472	14.6342	0.000153291	0.00411764	2.38535	rbm33a	-1.62514	-1.0254
Periderm	ENSDARG00000008439	-4.16255	8.73779	9.87056	0.00181397	0.0183074	1.73737	atxn10	1.07218	NA
Periderm	ENSDARG00000035150	-4.15165	9.94764	18.0373	3.02666e-05	0.00146793	2.83329	drll.2	-3.33237	NA
Periderm	ENSDARG00000012078	-4.09155	10.9393	24.8482	1.2115e-06	8.81364e-05	4.05484	meis1b	0.371857	0.257061
Periderm	ENSDARG00000018814	-4.07201	8.73171	11.7523	0.000674294	0.0101493	1.99356	esrp2	4.05046	3.48134
Periderm	ENSDARG00000071478	-4.05506	10.8017	16.795	5.73626e-05	0.00232919	2.6328	lnx2b	1.93887	0.442428
Periderm	ENSDARG00000059279	-4.04266	11.389	24.9103	1.19766e-06	8.81364e-05	4.05484	tfap2a	-1.69834	0.159198
Periderm	ENSDARG00000003971	-4.02317	10.7188	33.7072	2.04889e-08	4.4717e-06	5.34953	isl2a	NA	-0.949256
Periderm	ENSDARG00000060238	-3.96647	9.34144	14.3836	0.000180561	0.00461293	2.33602	uacab	0.914636	0.037515
Periderm	ENSDARG00000045626	-3.92737	8.65318	10.356	0.00139847	0.015454	1.81096	nek8	NA	NA
Periderm	ENSDARG00000037484	-3.86441	8.64911	8.58549	0.00358551	0.0300261	1.5225	tmem192	NA	1.71301
Periderm	ENSDARG00000029894	-3.84597	9.27262	11.1318	0.000953691	0.0124265	1.90565	slc2a15a	NA	NA
Periderm	ENSDARG00000042151	-3.84366	10.8309	15.1674	0.000128224	0.00373132	2.42814	skia	0.465165	0.609228
Periderm	ENSDARG00000060526	-3.83248	9.25342	16.2824	6.88177e-05	0.00250324	2.6015	bmp3	NA	-0.0409666
Periderm	ENSDARG00000070864	-3.78644	9.311	15.7993	8.78722e-05	0.00294781	2.5305	bcl6aa	0.68807	1.03875
Periderm	ENSDARG00000070801	-3.7825	9.63117	10.7377	0.00118428	0.0143594	1.84286	opa1	-0.457863	-0.540905
Periderm	ENSDARG00000039459	-3.76568	10.1564	10.1192	0.0016516	0.0173717	1.76016	qsox1	0.28327	-3.4678
Periderm	ENSDARG00000045249	-3.75989	8.58517	7.1716	0.00771148	0.0470778	1.32718	nif3l1	NA	NA
Periderm	ENSDARG00000020164	-3.75422	9.65239	14.8046	0.000148193	0.00407785	2.38957	efnb2a	-1.19965	-0.0806249
Periderm	ENSDARG00000061841	-3.70697	9.65391	9.32254	0.0024854	0.023206	1.6344	tiparp	-1.08963	0.249333
Periderm	ENSDARG00000043243	-3.70589	10.0473	25.7956	7.30067e-07	6.37348e-05	4.19562	prkchb	5.37244	5.11017
Periderm	ENSDARG00000061713	-3.6769	8.48448	8.14404	0.00454255	0.0346345	1.46049	tpd52	2.3724	NA
Periderm	ENSDARG00000040606	-3.64908	9.68611	19.9434	1.16508e-05	0.000633456	3.19828	tfap2c	-0.412731	0.552215
Periderm	ENSDARG00000005927	-3.64354	8.48995	7.99623	0.00491968	0.036866	1.43337	tbc1d17	2.75808	1.25928
Periderm	ENSDARG00000061974	-3.62546	8.5152	9.66005	0.00201544	0.0197231	1.70502	grhl2b	0.0106505	-0.873082
Periderm	ENSDARG00000061798	-3.54366	8.47407	9.0432	0.00279921	0.0246839	1.60759	arhgap27l	1.03281	1.41897
Periderm	ENSDARG00000071560	-3.50927	10.3231	25.5292	8.43628e-07	6.69534e-05	4.17423	dlx4b	NA	1.46765
Periderm	ENSDARG00000035563	-3.49032	9.47085	12.2884	0.000527319	0.00893883	2.04872	znf703	NA	-1.25895
Periderm	ENSDARG00000069980	-3.48031	9.09196	11.252	0.000888038	0.0117463	1.9301	lman1	-1.2912	-3.48626
Periderm	ENSDARG00000014626	-3.42858	10.0861	19.3896	1.56202e-05	0.000802141	3.09575	dlx3b	NA	-0.311304
Periderm	ENSDARG00000035253	-3.41752	9.00396	11.6686	0.000712615	0.0102829	1.98789	npr3	-1.7825	0.196099
Periderm	ENSDARG00000030999	-3.38006	8.9378	7.99942	0.00495139	0.036945	1.43244	mybl1	-2.25394	-0.365893
Periderm	ENSDARG00000020541	-3.37581	9.00663	10.5049	0.00130891	0.0150352	1.82289	ism1	0.595336	-2.93106
Periderm	ENSDARG00000090063	-3.33127	8.98476	12.8464	0.000386263	0.00725177	2.13956	fa2h	2.61826	3.38758
Periderm	ENSDARG00000037320	-3.31091	8.9085	10.5571	0.00126877	0.0148718	1.82764	fam131c	-1.05369	NA
Periderm	ENSDARG00000036820	-3.25718	8.90244	13.0272	0.000350814	0.00704047	2.1524	mgll	4.014	4.58573
Periderm	ENSDARG00000018492	-3.23942	9.4465	7.97801	0.00505156	0.0373241	1.42801	znf503	NA	-0.376893
Periderm	ENSDARG00000027112	-3.21801	8.9346	10.2074	0.00152521	0.0164384	1.78414	ephb4b	-2.36859	-2.18652
Periderm	ENSDARG00000015536	-3.21326	11.3375	25.7093	8.30236e-07	6.69534e-05	4.17423	sox6	-0.247442	-0.471355
Periderm	ENSDARG00000087844	-3.15355	8.80926	7.88803	0.00524335	0.0379871	1.42036	plekhn1	1.56854	1.38193
Periderm	ENSDARG00000031894	-3.12321	10.5227	9.73904	0.00202198	0.0197231	1.70502	lef1	-0.537509	-0.55873
Periderm	ENSDARG00000061352	-3.10883	12.0336	44.1717	2.44764e-10	9.2504e-08	7.03384	bcl11aa	0.663191	-0.417625
Periderm	ENSDARG00000076564	-3.05974	9.88764	12.7034	0.00043182	0.00785373	2.10492	hspg2	-1.91973	-2.05592
Periderm	ENSDARG00000062646	-3.05738	10.5206	11.0023	0.00104869	0.0132682	1.87719	tet3	-1.30113	0.313597
Periderm	ENSDARG00000010770	-3.05442	8.85247	7.51083	0.0064324	0.0422217	1.37446	sox19a	NA	-3.5592
Periderm	ENSDARG00000033551	-3.01052	10.6653	12.2348	0.000559276	0.00912613	2.03971	fbxw4	-1.77797	-1.88896
Periderm	ENSDARG00000042627	-2.98085	9.4316	11.7294	0.000701002	0.0101996	1.99142	nhsl1b	0.812548	-1.00398
Periderm	ENSDARG00000033184	-2.97867	8.79591	8.58166	0.00360195	0.0300261	1.5225	prkar2aa	-0.204031	1.44433
Periderm	ENSDARG00000086678	-2.96854	11.0585	16.2375	7.60824e-05	0.0026568	2.57564	ascc3	0.089058	-0.0887215
Periderm	ENSDARG00000078803	-2.94323	8.7619	8.57711	0.00361139	0.0300261	1.5225	gas2l1	2.57052	2.1018
Periderm	ENSDARG00000087822	-2.90184	10.5499	11.9246	0.000653756	0.00999585	2.00018	agap3	2.05567	1.44086
Periderm	ENSDARG00000094799	-2.84715	9.28257	9.08482	0.00278605	0.0246839	1.60759	plxnb2a	0.496923	NA
Periderm	ENSDARG00000055502	-2.84669	8.71512	7.62059	0.00604619	0.0406025	1.39145	cicb	-0.784839	-1.3864
Periderm	ENSDARG00000060978	-2.81094	8.67131	8.31841	0.00414068	0.032862	1.48331	atp2a3	3.48782	4.04693
Periderm	ENSDARG00000099694	-2.81056	8.69533	8.23382	0.00433588	0.0333059	1.47748	neurl1b	-0.037152	2.37066
Periderm	ENSDARG00000062123	-2.7794	11.5708	10.8326	0.00116258	0.0142948	1.84482	agap1	-1.13473	-0.985795
Periderm	ENSDARG00000036161	-2.76161	8.71348	7.87218	0.0052703	0.0380246	1.41994	hnrnpa0l	NA	-1.7448
Periderm	ENSDARG00000054454	-2.73632	10.7744	11.5647	0.000789699	0.0110892	1.9551	epha4a	-2.24611	-4.26473
Periderm	ENSDARG00000059327	-2.71227	11.6506	17.1643	4.90908e-05	0.00209055	2.67974	gata2a	1.06099	-4.34871
Periderm	ENSDARG00000073869	-2.71209	11.3795	13.1374	0.000359117	0.0071252	2.1472	pdzrn3b	-0.0715841	0.861075
Periderm	ENSDARG00000029729	-2.69113	12.1055	24.6518	1.40838e-06	9.83616e-05	4.00717	clybl	-1.64452	NA
Periderm	ENSDARG00000038792	-2.68967	9.35605	9.67423	0.00204316	0.0198186	1.70293	klf17	NA	-2.92412
Periderm	ENSDARG00000062720	-2.67004	9.18761	10.5498	0.0012831	0.0149353	1.82579	pcdh1a	1.17422	1.19819
Periderm	ENSDARG00000060758	-2.65119	11.1629	13.8623	0.000248586	0.00555706	2.25515	nphs1	-0.0156102	NA
Periderm	ENSDARG00000026801	-2.64497	10.6405	10.3846	0.00144767	0.0157245	1.80342	stau2	-1.20421	-0.109622
Periderm	ENSDARG00000056695	-2.63911	9.16053	7.86802	0.00533054	0.0382915	1.4169	phc2a	-1.10562	-1.09357
Periderm	ENSDARG00000006615	-2.6311	10.8787	13.827	0.000251436	0.00555706	2.25515	hnf1ba	-2.06746	-2.44238
Periderm	ENSDARG00000104665	-2.60464	12.0397	10.9196	0.00111643	0.0139235	1.85625	kirrel3l	-4.35886	-4.49405
Periderm	ENSDARG00000028335	-2.6037	8.95375	7.63037	0.00603393	0.0406025	1.39145	hmga1a	-2.31294	-1.00641
Periderm	ENSDARG00000007723	-2.55564	9.13641	8.24499	0.00434922	0.0333059	1.47748	efnb1	-3.1271	-2.2021
Periderm	ENSDARG00000004074	-2.53054	8.90532	7.15397	0.00781631	0.0475515	1.32284	bach2b	-0.511828	0.306927
Periderm	ENSDARG00000033172	-2.52435	8.85664	7.56285	0.0062501	0.041811	1.37871	nr2f5	-1.61961	-0.0490961
Periderm	ENSDARG00000078191	-2.50651	9.32023	7.92395	0.00518793	0.0377422	1.42317	zbtb46	0.657493	0.562203
Periderm	ENSDARG00000104815	-2.50408	10.1614	17.6503	3.66625e-05	0.00173007	2.76194	lmx1ba	2.55308	1.65506
Periderm	ENSDARG00000060397	-2.48294	10.4387	10.8108	0.00115706	0.0142948	1.84482	hhip	-0.163871	-0.894882
Periderm	ENSDARG00000028386	-2.39849	10.9408	7.90708	0.00535116	0.0382915	1.4169	htatip2	NA	-0.43725
Periderm	ENSDARG00000067524	-2.38738	8.79276	7.65333	0.00594185	0.0402111	1.39565	fut9b	NA	3.68082
Periderm	ENSDARG00000057859	-2.37556	10.6592	15.7934	9.37655e-05	0.00298732	2.52472	hoxd10a	NA	-3.6467
Periderm	ENSDARG00000062936	-2.37284	9.05808	7.53249	0.00637865	0.0422217	1.37446	ndnf	-3.90763	-2.41669
Periderm	ENSDARG00000058730	-2.36022	9.77821	8.55203	0.00373594	0.0306241	1.51394	rdh10a	-4.6407	-3.96142
Periderm	ENSDARG00000039701	-2.35311	10.5051	16.5957	6.27169e-05	0.00243342	2.61378	emx2	NA	-0.946531
Periderm	ENSDARG00000007369	-2.32526	10.9169	9.61176	0.00217522	0.0207537	1.6829	tcf7l1b	-2.70129	-2.76944
Periderm	ENSDARG00000038159	-2.32021	8.80378	7.37408	0.00692137	0.0437852	1.35867	tcf7l1a	-1.28445	-1.60817
Periderm	ENSDARG00000060929	-2.27628	13.2602	10.5868	0.00133092	0.0151882	1.81849	rnf220a	-4.43643	-2.13745
Periderm	ENSDARG00000009266	-2.25104	8.79569	7.20596	0.0075837	0.0467885	1.32986	uevld	2.95464	3.47908
Periderm	ENSDARG00000102068	-2.22652	10.011	10.008	0.00173964	0.0178671	1.74794	shcbp1	0.263813	0.0101515
Periderm	ENSDARG00000054754	-2.22493	10.2308	8.86413	0.00319085	0.0277175	1.55725	hs6st1a	-2.11581	-2.71995
Periderm	ENSDARG00000016464	-2.20688	9.18617	7.7424	0.00570036	0.0391844	1.40689	cdc42bpab	1.65356	1.65037
Periderm	ENSDARG00000090764	-2.18473	12.7482	9.53482	0.00229133	0.0216252	1.66504	bcas3	-1.60859	-1.83788
Periderm	ENSDARG00000062178	-2.18331	9.11992	7.46962	0.00660622	0.0432002	1.36451	ripor1	-2.43302	-1.95721
Periderm	ENSDARG00000042277	-2.15231	10.8712	13.6507	0.000275161	0.00578834	2.23745	efnb3b	-2.3518	-1.88054
Periderm	ENSDARG00000022418	-2.13722	10.8463	9.27627	0.00259157	0.023567	1.62769	faf1	0.00546115	0.483063
Periderm	ENSDARG00000086645	-2.12787	10.819	12.3356	0.000534203	0.00896845	2.04728	hs3st3b1b	-1.84858	-0.953091
Periderm	ENSDARG00000108937	-2.09373	9.27833	7.35295	0.00705065	0.044442	1.35221	FO704750.1	NA	NA
Periderm	ENSDARG00000055678	-2.0744	9.87821	7.41559	0.00688462	0.0437111	1.35941	akap12b	-1.94832	-1.63475
Periderm	ENSDARG00000004635	-2.01105	10.7259	7.77376	0.0057382	0.0392898	1.40572	epha7	-1.29589	0.403744
Periderm	ENSDARG00000053479	-2.00814	10.855	14.1474	0.000214477	0.00520106	2.28391	gdf6a	NA	-5.18341
Periderm	ENSDARG00000026629	-1.9788	10.2292	11.0478	0.00101983	0.0130928	1.88297	gmds	3.40623	3.64629
Periderm	ENSDARG00000101244	-1.94312	10.0765	8.01716	0.00499647	0.0371227	1.43036	gli1	-2.17202	-1.58891
Periderm	ENSDARG00000068967	-1.93068	11.9735	9.30061	0.00258268	0.023567	1.62769	zgc:153372	-3.8973	NA
Periderm	ENSDARG00000062420	-1.92681	12.6193	7.86202	0.00552624	0.0385952	1.41347	nfia	-2.41053	-1.49468
Periderm	ENSDARG00000101584	-1.90283	10.8745	12.1058	0.000601635	0.00946355	2.02395	CU467822.2	-1.22552	-2.66449
Periderm	ENSDARG00000061017	-1.89013	10.1495	12.0762	0.000599834	0.00946355	2.02395	spns2	2.93997	3.48092
Periderm	ENSDARG00000033614	-1.8374	9.90446	7.74598	0.00576413	0.0393132	1.40546	rasgef1ba	-1.12358	-0.266867
Periderm	ENSDARG00000055554	-1.83124	9.69661	7.97253	0.00508613	0.0373241	1.42801	wnt1	NA	-4.44019
Periderm	ENSDARG00000099441	-1.79167	9.45118	8.2666	0.00432207	0.0333059	1.47748	cbx4	1.67204	0.531148
Periderm	ENSDARG00000105112	-1.77511	11.8382	10.424	0.00144043	0.0157245	1.80342	ntn1a	-4.32536	-3.83464
Periderm	ENSDARG00000017121	-1.76754	10.4915	12.2643	0.000550204	0.00912613	2.03971	mafba	NA	0.546806
Periderm	ENSDARG00000042368	-1.73442	10.2675	10.9705	0.00106308	0.0133536	1.8744	kif26aa	-1.93011	-6.10213
Periderm	ENSDARG00000017266	-1.73157	9.96308	7.84659	0.00546763	0.0383787	1.41591	scml4	-1.32304	NA
Periderm	ENSDARG00000031337	-1.72382	10.5018	8.29114	0.00434349	0.0333059	1.47748	hoxa10b	NA	0.371594
Periderm	ENSDARG00000002216	-1.71211	11.3991	13.3282	0.000327244	0.00672198	2.1725	tbx3a	NA	0.677406
Periderm	ENSDARG00000036175	-1.70376	11.7468	7.447	0.00688318	0.0437111	1.35941	pcdh1b	1.57989	0.439376
Periderm	ENSDARG00000067591	-1.70078	9.83236	7.77584	0.00566553	0.0390989	1.40784	puraa	NA	NA
Periderm	ENSDARG00000100940	-1.67405	10.7124	7.3742	0.0071138	0.0445902	1.35076	nr5a2	-1.91246	NA
Periderm	ENSDARG00000055158	-1.61465	10.5835	9.67184	0.00210092	0.0202664	1.69322	prox1a	-0.858405	-3.12321
Periderm	ENSDARG00000044098	-1.58394	9.88098	8.17486	0.00457853	0.034757	1.45896	egr2a	NA	1.13012
Periderm	ENSDARG00000017821	-1.58383	10.6008	9.90134	0.00186418	0.0187061	1.72802	gata5	-0.0402188	-3.92987
Periderm	ENSDARG00000031108	-1.51904	11.819	11.8464	0.000695372	0.0101996	1.99142	lrba	2.57293	2.5102
Periderm	ENSDARG00000094992	-1.51264	10.8142	9.41106	0.00241594	0.0226787	1.64438	otx1	NA	-2.55691
Periderm	ENSDARG00000103862	-1.50959	12.4581	9.02048	0.00299631	0.0262892	1.58022	hoxa4a	-4.10886	-2.38622
Periderm	ENSDARG00000016706	-1.4741	11.0666	11.142	0.000988564	0.0127854	1.89328	atic	-0.60811	-1.36696
Periderm	ENSDARG00000070339	-1.45668	13.4443	7.50375	0.0066982	0.0434761	1.36175	hoxc3a	-2.46181	-3.31641
Periderm	ENSDARG00000031891	-1.37917	11.5361	10.2669	0.00155945	0.0167043	1.77717	tbx1	-4.42065	-4.93146
Periderm	ENSDARG00000076414	-1.37086	10.7874	7.45248	0.00682609	0.0437111	1.35941	espn	-1.03084	NA
Periderm	ENSDARG00000036051	-1.35851	12.3284	7.16299	0.00803245	0.0486967	1.3125	irx4b	-0.186037	NA
Periderm	ENSDARG00000070348	-1.35672	13.5559	13.0031	0.000390429	0.00725202	2.13954	hoxc10a	-1.18711	-1.53192
Periderm	ENSDARG00000100244	-1.33068	12.1931	12.2958	0.000555149	0.00912613	2.03971	ebf3a	-2.95256	-1.12962
Periderm	ENSDARG00000061836	-1.32642	11.3088	9.55809	0.0022494	0.0213449	1.67071	nfixb	-0.680492	NA
Periderm	ENSDARG00000005861	-1.32026	10.8197	7.4896	0.00669295	0.0434761	1.36175	ralgapa2	0.821351	0.356346
Periderm	ENSDARG00000052697	-1.29365	11.4366	7.8758	0.00546591	0.0383787	1.41591	fam172a	-0.674088	-0.13895
Periderm	ENSDARG00000044532	-1.21551	11.0231	8.57271	0.00376445	0.0307137	1.51267	nr4a2b	NA	NA
Periderm	ENSDARG00000037383	-1.15683	11.4353	7.38065	0.00712524	0.0445902	1.35076	pax5	-1.88849	-3.73615
Periderm	ENSDARG00000056856	-1.12765	12.955	7.48014	0.00678088	0.0437111	1.35941	tax1bp1b	-0.216994	0.739151
Periderm	ENSDARG00000078701	-1.05277	11.1722	7.3598	0.00719548	0.0448302	1.34843	prdm13	NA	-4.00136
Pharangeal_Arch	ENSDARG00000030402	-2.24739	9.80985	20.9776	7.03364e-06	0.000196252	3.70719	twist1a	NA	3.70836
Pharangeal_Arch	ENSDARG00000068732	-2.19065	8.82926	11.4208	0.00080125	0.00958133	2.01857	spry4	1.3399	1.40333
Pharangeal_Arch	ENSDARG00000115978	-2.10906	9.66196	15.3152	0.000113287	0.00199021	2.7011	AL935186.10	NA	-0.723808
Pharangeal_Arch	ENSDARG00000052695	-1.9612	11.3154	16.4531	6.99575e-05	0.00140211	2.85322	nr2f1a	-0.0603994	0.362328
Pharangeal_Arch	ENSDARG00000026473	-1.94362	10.6944	26.341	6.11724e-07	3.00049e-05	4.52281	six1b	NA	2.79531
Pharangeal_Arch	ENSDARG00000033971	-1.93834	9.14727	15.4888	0.000100408	0.0018313	2.73724	prrx1a	NA	4.6226
Pharangeal_Arch	ENSDARG00000100149	-1.85529	9.01051	8.23666	0.00435085	0.0347824	1.45864	axin2	0.889006	1.00006
Pharangeal_Arch	ENSDARG00000103576	-1.85266	9.0344	9.00889	0.00287643	0.0257431	1.58934	EPHB3	0.497405	1.2869
Pharangeal_Arch	ENSDARG00000055443	-1.73245	9.58587	8.89235	0.00310831	0.0276445	1.55839	zcchc7	-0.695434	-0.395916
Pharangeal_Arch	ENSDARG00000091481	-1.69059	10.4754	15.8661	9.06866e-05	0.00172063	2.76431	foxc1a	NA	1.08207
Pharangeal_Arch	ENSDARG00000004695	-1.59092	9.65625	12.4086	0.000497432	0.00680621	2.16709	six4a	1.419	0.67471
Pharangeal_Arch	ENSDARG00000117549	-1.5199	10.3183	14.925	0.000143661	0.00240505	2.61888	FQ790211.1	-1.46012	NA
Pharangeal_Arch	ENSDARG00000010186	-1.48878	8.83392	9.14232	0.00266411	0.0248111	1.60535	myo3a	0.466124	-0.195672
Pharangeal_Arch	ENSDARG00000028335	-1.46951	8.97375	7.35884	0.0069851	0.0489646	1.31012	hmga1a	-1.18402	-0.730424
Pharangeal_Arch	ENSDARG00000060994	-1.44293	10.1665	8.16059	0.00464072	0.0364848	1.43789	fbxw7	-0.252276	-0.0496891
Pharangeal_Arch	ENSDARG00000063895	-1.43803	10.881	12.274	0.000555517	0.00751676	2.12397	mt-nd1	NA	0.185119
Pharangeal_Arch	ENSDARG00000102906	-1.43322	9.4575	7.34962	0.00709368	0.0492405	1.30768	hibadha	0.783667	NA
Pharangeal_Arch	ENSDARG00000034043	-1.36259	10.9253	10.5746	0.00132668	0.0144111	1.8413	irx5a	NA	0.0913355
Pharangeal_Arch	ENSDARG00000057859	-1.35851	10.6894	11.8496	0.000686669	0.00843594	2.07387	hoxd10a	NA	1.28498
Pharangeal_Arch	ENSDARG00000070864	-1.34461	9.33815	8.03098	0.00488957	0.0380211	1.41998	bcl6aa	0.789697	1.50911
Pharangeal_Arch	ENSDARG00000038159	-1.32355	8.83318	7.47167	0.00655845	0.0466634	1.33102	tcf7l1a	0.24479	0.435212
Pharangeal_Arch	ENSDARG00000075542	-1.31455	10.6349	10.536	0.00134681	0.014519	1.83806	zfhx4	0.503331	0.663317
Pharangeal_Arch	ENSDARG00000059274	-1.25707	10.3626	9.50776	0.00228635	0.0218354	1.66084	hoxd9a	NA	1.20248
Pharangeal_Arch	ENSDARG00000038446	-1.24336	9.69741	8.066	0.00483905	0.037835	1.42211	nrp2b	-0.104517	1.11157
Pharangeal_Arch	ENSDARG00000026611	-1.23395	9.36699	7.53463	0.00639686	0.0457424	1.33968	socs3b	2.22473	2.95177
Pharangeal_Arch	ENSDARG00000056819	-1.17494	10.3878	8.54567	0.00379822	0.0312853	1.50466	hoxa9b	NA	0.987797
Pharangeal_Arch	ENSDARG00000103862	-1.13696	12.4874	9.82227	0.00198231	0.0194394	1.71132	hoxa4a	0.660009	0.810022
Pharangeal_Arch	ENSDARG00000098788	-1.13643	14.5079	12.7071	0.000456809	0.00637293	2.19566	pcdh2g28	1.5778	1.4714
Pharangeal_Arch	ENSDARG00000029263	-1.03054	13.9227	7.71729	0.00599595	0.0433109	1.3634	hoxb3a	0.366156	0.769016
Spinal_Cord	ENSDARG00000054030	-6.00954	9.97813	24.7119	1.19608e-06	0.00024647	3.60824	hoxb5b	NA	2.7607
Spinal_Cord	ENSDARG00000018492	-5.15088	9.35495	10.5067	0.00131733	0.0419778	1.37698	znf503	NA	1.83516
Spinal_Cord	ENSDARG00000103862	-4.87814	12.3666	36.3156	6.72482e-09	1.35636e-05	4.86763	hoxa4a	3.90503	3.82506
Spinal_Cord	ENSDARG00000101163	-4.47682	8.88205	13.9852	0.000213628	0.0120317	1.91967	BX001023.2	NA	2.0024
Spinal_Cord	ENSDARG00000059280	-4.45435	12.1185	28.0731	2.75274e-07	9.20395e-05	4.03603	hoxd3a	2.92708	3.09396
Spinal_Cord	ENSDARG00000101576	-4.44496	8.86966	10.5413	0.0012738	0.0411977	1.38513	tbxta	-4.10654	-0.396617
Spinal_Cord	ENSDARG00000026395	-4.43297	10.3421	10.472	0.00137075	0.0425835	1.37076	rfx4	3.33607	3.00786
Spinal_Cord	ENSDARG00000091198	-4.18811	8.7039	10.3407	0.00140921	0.0426556	1.37002	urm1	0.410319	-2.55663
Spinal_Cord	ENSDARG00000026513	-3.89901	9.71377	15.3795	0.000110027	0.00895769	2.0478	hoxb6b	NA	2.83275
Spinal_Cord	ENSDARG00000058248	-3.78028	8.5189	9.96479	0.00171017	0.0480679	1.31814	si:dkeyp-77h1.4	-2.40563	-2.09082
Spinal_Cord	ENSDARG00000054023	-3.72096	9.17398	14.0124	0.000214032	0.0120317	1.91967	ttll6	2.53746	2.77128
Spinal_Cord	ENSDARG00000029263	-3.66251	13.8065	23.7135	2.13995e-06	0.000297201	3.52695	hoxb3a	3.05569	2.78604
Spinal_Cord	ENSDARG00000095896	-3.52062	10.2666	13.7773	0.000251261	0.0131828	1.87999	pou3f3b	NA	2.01886
Spinal_Cord	ENSDARG00000103361	-3.14942	10.1964	12.6186	0.000452084	0.020139	1.69596	tshz3b	2.28754	2.38481
Spinal_Cord	ENSDARG00000001498	-3.12238	10.5995	13.9402	0.000233715	0.0128326	1.89169	skap1	2.68792	1.57581
Spinal_Cord	ENSDARG00000042032	-3.10512	10.1731	11.3132	0.000882622	0.0312931	1.50455	pou3f3a	NA	3.17521
Spinal_Cord	ENSDARG00000002026	-2.94721	9.34507	11.6172	0.000736839	0.0277813	1.55625	qkib	3.03412	2.66385
Spinal_Cord	ENSDARG00000076262	-2.80581	10.1042	10.8334	0.00112991	0.0381102	1.41896	pou3f2b	NA	2.55599
Spinal_Cord	ENSDARG00000098240	-2.34388	11.1165	11.939	0.000651631	0.0260763	1.58375	meis2a	1.59182	1.63318
Spinal_Cord	ENSDARG00000077840	-2.21441	10.8261	11.3274	0.000888029	0.0312931	1.50455	meis2a	0.609028	0.80004
Floorplate_Neural_Tube	ENSDARG00000033978	-6.19725	10.0922	11.5762	0.000774987	0.0188633	1.72438	nxn	-0.584825	0.365837
Floorplate_Neural_Tube	ENSDARG00000102138	-5.93795	9.90948	21.7923	4.81975e-06	0.000325127	3.48795	foxa1	NA	5.20836
Floorplate_Neural_Tube	ENSDARG00000012788	-5.8638	9.85202	17.4926	3.90436e-05	0.00173928	2.75963	foxa3	NA	1.95665
Floorplate_Neural_Tube	ENSDARG00000087094	-5.50538	9.54538	11.784	0.000685073	0.017207	1.76429	foxa	-0.140045	-1.19855
Floorplate_Neural_Tube	ENSDARG00000033683	-5.44595	9.52122	16.7049	5.65136e-05	0.00230049	2.63818	tpma	1.21528	-0.370064
Floorplate_Neural_Tube	ENSDARG00000054033	-5.24518	9.37675	10.7404	0.00116957	0.0251368	1.59969	hoxb1b	NA	-0.797586
Floorplate_Neural_Tube	ENSDARG00000013207	-5.19697	9.36959	10.5437	0.00129468	0.0270508	1.56782	zeb1b	-1.90133	-1.49323
Floorplate_Neural_Tube	ENSDARG00000069980	-4.68668	8.99491	9.37129	0.00237646	0.0434947	1.36156	lman1	2.22545	2.83332
Floorplate_Neural_Tube	ENSDARG00000068567	-4.52105	11.8518	30.6723	8.27304e-08	1.02803e-05	4.98799	shha	3.30295	4.41558
Floorplate_Neural_Tube	ENSDARG00000053133	-4.52068	8.9052	10.3996	0.00137569	0.0280001	1.55284	b3gnt7l	NA	-1.02632
Floorplate_Neural_Tube	ENSDARG00000052695	-4.51142	11.2026	16.9264	5.35583e-05	0.00225806	2.64627	nr2f1a	0.129459	1.22709
Floorplate_Neural_Tube	ENSDARG00000045401	-4.4582	8.88234	10.4495	0.00133831	0.0274761	1.56105	mllt10	-0.398713	-0.877899
Floorplate_Neural_Tube	ENSDARG00000002510	-4.15459	8.68843	9.77509	0.00190115	0.0364929	1.43779	dmbx1b	NA	-3.25132
Floorplate_Neural_Tube	ENSDARG00000067591	-3.97726	9.74606	13.5836	0.000273842	0.00828899	2.0815	puraa	NA	1.15981
Floorplate_Neural_Tube	ENSDARG00000008852	-3.97334	10.319	10.9447	0.00107328	0.0239058	1.6215	elp4	-2.21316	-0.453324
Floorplate_Neural_Tube	ENSDARG00000056027	-3.95791	10.7055	15.051	0.000134193	0.00452613	2.34427	hoxb8a	NA	0.413731
Floorplate_Neural_Tube	ENSDARG00000002216	-3.94108	11.3107	27.0895	4.20913e-07	3.9751e-05	4.40065	tbx3a	NA	0.0885439
Floorplate_Neural_Tube	ENSDARG00000056594	-3.73118	9.52772	11.4651	0.000804927	0.0193012	1.71441	irx1b	NA	-2.31883
Floorplate_Neural_Tube	ENSDARG00000007349	-3.69056	10.0401	10.7838	0.00116051	0.0251368	1.59969	dmrt1	0.925162	NA
Floorplate_Neural_Tube	ENSDARG00000003411	-3.61211	10.453	16.2549	7.32018e-05	0.00288049	2.54053	foxa2	NA	1.31887
Floorplate_Neural_Tube	ENSDARG00000036051	-3.4811	12.2335	20.6287	9.08822e-06	0.000579927	3.23663	irx4b	-2.04836	NA
Floorplate_Neural_Tube	ENSDARG00000104665	-3.44283	11.9465	10.151	0.00164452	0.0320885	1.49365	kirrel3l	-3.13164	-1.28122
Floorplate_Neural_Tube	ENSDARG00000055373	-3.40973	10.288	9.63024	0.00212536	0.0398251	1.39984	sema3fb	-0.0701317	2.19073
Floorplate_Neural_Tube	ENSDARG00000070337	-3.30796	10.7219	13.0239	0.000372099	0.010846	1.96473	hoxc1a	-0.0220466	-2.18253
Floorplate_Neural_Tube	ENSDARG00000098952	-3.29385	9.74326	15.7746	9.04646e-05	0.0033373	2.47661	gata4	NA	-3.29862
Floorplate_Neural_Tube	ENSDARG00000014018	-3.24565	11.0091	19.4972	1.52247e-05	0.000835945	3.07782	lhx1a	-3.49879	-2.93471
Floorplate_Neural_Tube	ENSDARG00000007369	-3.20936	10.8354	9.41339	0.00239678	0.0435292	1.36122	tcf7l1b	0.0870034	0.442703
Floorplate_Neural_Tube	ENSDARG00000029263	-3.17341	13.8066	18.8597	2.15253e-05	0.0010813	2.96605	hoxb3a	-0.887586	0.265232
Floorplate_Neural_Tube	ENSDARG00000080009	-3.14475	10.0523	10.7611	0.00117294	0.0251368	1.59969	bahcc1b	0.233737	0.394946
Floorplate_Neural_Tube	ENSDARG00000038867	-2.94554	10.609	15.6003	0.000101818	0.00364231	2.43862	shhb	-0.201324	-1.88772
Floorplate_Neural_Tube	ENSDARG00000020656	-2.9219	9.82355	11.4162	0.000830599	0.0196104	1.70751	prkg1a	0.778991	1.92411
Floorplate_Neural_Tube	ENSDARG00000103057	-2.80972	10.745	10.0236	0.00174104	0.0336935	1.47245	zfhx3	1.84186	1.5937
Floorplate_Neural_Tube	ENSDARG00000034043	-2.77296	10.8073	10.8736	0.00112061	0.0247267	1.60683	irx5a	NA	0.307699
Floorplate_Neural_Tube	ENSDARG00000056030	-2.66351	10.485	9.18922	0.00268714	0.0469951	1.32795	hoxb7a	-2.21845	-0.974168
Floorplate_Neural_Tube	ENSDARG00000102153	-2.57337	10.6088	9.72985	0.00202663	0.038279	1.41704	nrp1a	-0.566331	0.0309854
Floorplate_Neural_Tube	ENSDARG00000100398	-2.48399	11.777	19.2133	1.78698e-05	0.000937571	3.028	pax7a	-0.768362	-1.08576
Floorplate_Neural_Tube	ENSDARG00000063908	-2.26107	10.3724	9.24553	0.00260506	0.0467557	1.33017	mt-co2	NA	-0.7791
Floorplate_Neural_Tube	ENSDARG00000023316	-2.11804	10.4037	12.5202	0.000478441	0.0132894	1.87649	sim1a	-1.1253	-5.37667
Floorplate_Neural_Tube	ENSDARG00000037383	-1.80248	11.3363	9.76753	0.0020032	0.0381416	1.4186	pax5	-3.69484	-3.73718
Floorplate_Neural_Tube	ENSDARG00000056491	-1.79225	12.6844	16.2391	7.68376e-05	0.00292603	2.53372	ikzf5	-0.834315	0.046517
Differentiating_Neurons	ENSDARG00000062646	-4.63893	10.5528	32.856	2.97445e-08	2.82176e-06	5.54948	tet3	1.41491	2.69971
Differentiating_Neurons	ENSDARG00000097211	-3.78824	9.10568	23.5082	1.90818e-06	7.68972e-05	4.11409	CR381647.3	NA	1.33411
Differentiating_Neurons	ENSDARG00000016128	-3.74372	9.0364	23.4523	1.9454e-06	7.68972e-05	4.11409	ap3m2	0.913603	3.00375
Differentiating_Neurons	ENSDARG00000076928	-3.5762	10.0259	22.1292	4.1196e-06	0.000119636	3.92214	tet2	1.738	1.92031
Differentiating_Neurons	ENSDARG00000004232	-2.97352	9.33295	25.0867	9.083e-07	4.61611e-05	4.33572	dlb	3.64765	4.86639
Differentiating_Neurons	ENSDARG00000075282	-2.95429	8.77946	15.7011	8.86097e-05	0.00123619	2.90791	irs2b	1.94628	2.6105
Differentiating_Neurons	ENSDARG00000025495	-2.94802	10.0242	37.9556	2.71791e-09	4.47831e-07	6.34889	nhlh2	NA	6.25084
Differentiating_Neurons	ENSDARG00000076262	-2.88504	10.2531	28.666	1.95565e-07	1.36684e-05	4.86428	pou3f2b	NA	2.5152
Differentiating_Neurons	ENSDARG00000016725	-2.87023	9.27252	22.5305	3.09336e-06	0.000102369	3.98983	gadd45gb.1	NA	2.48579
Differentiating_Neurons	ENSDARG00000095896	-2.67081	10.3952	24.0117	1.76172e-06	7.59674e-05	4.11937	pou3f3b	NA	1.87199
Differentiating_Neurons	ENSDARG00000014420	-2.6632	9.62885	23.6234	1.91797e-06	7.68972e-05	4.11409	elavl3	4.18358	5.17262
Differentiating_Neurons	ENSDARG00000057303	-2.64471	8.727	19.9955	1.01809e-05	0.000254166	3.59488	galnt7	0.0995263	-0.445495
Differentiating_Neurons	ENSDARG00000102879	-2.42887	11.1554	38.4444	2.83238e-09	4.47831e-07	6.34889	myt1b	4.40818	5.71802
Differentiating_Neurons	ENSDARG00000105344	-2.4104	8.75937	10.9219	0.00103753	0.00902004	2.04479	pkd1l2a	NA	NA
Differentiating_Neurons	ENSDARG00000052695	-2.39649	11.3154	19.9114	1.31481e-05	0.000299759	3.52323	nr2f1a	2.35113	2.41418
Differentiating_Neurons	ENSDARG00000069595	-2.38249	9.2322	10.2962	0.00146156	0.0113033	1.9468	si:ch211-214c7.4	-0.285777	-0.0787232
Differentiating_Neurons	ENSDARG00000074030	-2.22875	8.65425	12.0642	0.000569742	0.00559133	2.25248	myt1a	2.84517	4.16427
Differentiating_Neurons	ENSDARG00000069105	-2.16626	9.33345	9.64019	0.00207345	0.014681	1.83324	fgfr4	-1.45485	-1.10836
Differentiating_Neurons	ENSDARG00000019566	-2.1508	10.3785	28.6654	2.01712e-07	1.36684e-05	4.86428	neurod1	NA	4.14216
Differentiating_Neurons	ENSDARG00000091756	-2.13373	9.36509	18.5047	2.26345e-05	0.000441218	3.35535	insm1a	NA	4.58937
Differentiating_Neurons	ENSDARG00000077948	-2.11413	9.80552	7.03416	0.0084654	0.0394959	1.40345	usp54a	-1.94759	-2.08068
Differentiating_Neurons	ENSDARG00000037879	-2.11404	8.76732	8.83506	0.0031367	0.0199265	1.70057	lfng	0.130326	0.61043
Differentiating_Neurons	ENSDARG00000098788	-2.09569	14.5079	33.8707	2.35086e-08	2.38948e-06	5.6217	pcdh2g28	2.16471	2.5134
Differentiating_Neurons	ENSDARG00000003469	-2.06909	9.42084	14.0645	0.000211122	0.00257968	2.58843	neurod4	NA	3.88173
Differentiating_Neurons	ENSDARG00000007982	-1.93944	10.702	26.4018	5.99404e-07	3.4118e-05	4.46702	onecut1	NA	6.34356
Differentiating_Neurons	ENSDARG00000042032	-1.92905	10.2959	15.4123	0.0001127	0.00149881	2.82425	pou3f3a	NA	0.644225
Differentiating_Neurons	ENSDARG00000097984	-1.80457	11.4218	24.6467	1.42405e-06	6.53683e-05	4.18463	BX323067.1	2.08162	NA
Differentiating_Neurons	ENSDARG00000018693	-1.78874	10.1736	10.4218	0.00141314	0.0110489	1.95668	cdh2	-0.256497	0.20255
Differentiating_Neurons	ENSDARG00000006110	-1.78358	8.73649	8.14737	0.00453708	0.0248676	1.60437	chrd	-2.85571	-4.15744
Differentiating_Neurons	ENSDARG00000089701	-1.75927	9.46798	8.73263	0.00336898	0.0207387	1.68322	trabd2a	-0.153733	-0.106243
Differentiating_Neurons	ENSDARG00000035151	-1.75687	9.95772	9.9735	0.00177408	0.0132869	1.87657	drll.1	NA	-3.13267
Differentiating_Neurons	ENSDARG00000089271	-1.74362	8.71968	8.80053	0.00319097	0.0200918	1.69698	nexmifa	NA	3.94258
Differentiating_Neurons	ENSDARG00000036162	-1.70385	8.53526	7.33755	0.00703326	0.0341581	1.46651	hnrnpa0b	NA	-0.568968
Differentiating_Neurons	ENSDARG00000028335	-1.70171	8.9737	8.69461	0.00339434	0.0207387	1.68322	hmga1a	-2.10794	-1.58428
Differentiating_Neurons	ENSDARG00000063144	-1.69542	9.19312	11.2916	0.000867755	0.00796655	2.09873	shisa7b	3.07605	4.8146
Differentiating_Neurons	ENSDARG00000016464	-1.65595	9.22689	9.7066	0.00199501	0.0143378	1.84352	cdc42bpab	1.72277	2.18402
Differentiating_Neurons	ENSDARG00000090387	-1.65296	9.43773	10.8512	0.00110258	0.00928388	2.03227	onecut2	3.2169	4.33976
Differentiating_Neurons	ENSDARG00000063916	-1.6455	9.93224	10.6804	0.00122587	0.010021	1.99909	mt-nd4l	NA	-0.494664
Differentiating_Neurons	ENSDARG00000017168	-1.6399	10.4485	22.6196	3.45122e-06	0.000105287	3.97763	nr2f1b	2.61061	2.63932
Differentiating_Neurons	ENSDARG00000056130	-1.60269	9.50792	12.2306	0.000541628	0.00538977	2.26843	neurog1	NA	1.87989
Differentiating_Neurons	ENSDARG00000015709	-1.53746	8.66915	7.45903	0.00658588	0.0328832	1.48303	hsd17b12a	-1.11394	-1.8149
Differentiating_Neurons	ENSDARG00000063895	-1.52155	10.8808	11.9521	0.000654944	0.00625493	2.20378	mt-nd1	NA	-0.473665
Differentiating_Neurons	ENSDARG00000063917	-1.50763	10.3678	9.87549	0.00188665	0.0140561	1.85214	mt-nd4	NA	-0.352389
Differentiating_Neurons	ENSDARG00000101163	-1.47335	9.00843	8.32453	0.00414626	0.0237801	1.62379	BX001023.2	NA	2.37163
Differentiating_Neurons	ENSDARG00000063911	-1.43361	10.4391	10.6992	0.00123237	0.010021	1.99909	mt-atp6	NA	-0.230615
Differentiating_Neurons	ENSDARG00000057782	-1.41937	9.00076	6.6803	0.0101402	0.0448122	1.3486	baz2ba	0.792089	1.91246
Differentiating_Neurons	ENSDARG00000007944	-1.36661	9.46076	9.69353	0.00202621	0.0144889	1.83896	lhx1b	NA	NA
Differentiating_Neurons	ENSDARG00000037905	-1.36526	9.1271	7.96529	0.00504609	0.0269947	1.56872	cacna1aa	4.62094	5.42389
Differentiating_Neurons	ENSDARG00000026611	-1.35441	9.36694	8.07325	0.00478477	0.0257906	1.58854	socs3b	-0.46484	-0.949282
Differentiating_Neurons	ENSDARG00000075864	-1.33925	9.04161	6.4203	0.0117033	0.0494738	1.30562	igsf9a	0.193726	-0.946049
Differentiating_Neurons	ENSDARG00000055162	-1.33162	8.94827	7.81077	0.00546288	0.0287914	1.54074	zhx2a	-0.987514	0.0416453
Differentiating_Neurons	ENSDARG00000031222	-1.3137	10.82	15.2581	0.000124592	0.00161045	2.79305	lhx2b	2.53868	3.03176
Differentiating_Neurons	ENSDARG00000078567	-1.31	10.24	10.4309	0.00140998	0.0110489	1.95668	lonrf1l	NA	-1.41124
Differentiating_Neurons	ENSDARG00000063908	-1.30322	10.5231	9.84487	0.00192395	0.0141854	1.84816	mt-co2	NA	-0.121873
Differentiating_Neurons	ENSDARG00000063910	-1.30261	10.2489	9.77502	0.00198347	0.0143273	1.84384	mt-atp8	NA	0.271772
Differentiating_Neurons	ENSDARG00000037760	-1.28151	10.908	17.9073	3.41163e-05	0.000606844	3.21692	uncx4.1	NA	2.27845
Differentiating_Neurons	ENSDARG00000042285	-1.28145	9.09653	7.29693	0.00724596	0.0350714	1.45505	atp8b3	NA	NA
Differentiating_Neurons	ENSDARG00000017798	-1.27472	10.3489	7.49133	0.00666839	0.0331787	1.47914	bcor	0.423695	0.702273
Differentiating_Neurons	ENSDARG00000117549	-1.27053	10.3183	9.30791	0.0025382	0.0170371	1.76861	FQ790211.1	1.64106	NA
Differentiating_Neurons	ENSDARG00000070173	-1.26987	9.1058	7.75459	0.00565133	0.0295656	1.52921	gria2a	5.71772	6.42445
Differentiating_Neurons	ENSDARG00000104071	-1.26686	9.64835	7.5637	0.00633452	0.0319646	1.49533	hikeshi	NA	-0.585176
Differentiating_Neurons	ENSDARG00000103862	-1.2267	12.4874	9.68058	0.00213411	0.0148865	1.82721	hoxa4a	0.994857	1.05801
Differentiating_Neurons	ENSDARG00000077840	-1.2159	10.9796	10.1116	0.00168853	0.0127807	1.89345	meis2a	2.40351	2.7479
Differentiating_Neurons	ENSDARG00000000503	-1.20454	9.45727	8.34902	0.00413709	0.0237801	1.62379	stx1b	5.33158	6.22621
Differentiating_Neurons	ENSDARG00000069866	-1.20032	9.77574	8.3231	0.00422756	0.0238723	1.62211	sox1a	NA	1.39425
Differentiating_Neurons	ENSDARG00000054030	-1.17263	10.1037	6.61776	0.0106732	0.0465888	1.33172	hoxb5b	NA	0.934213
Differentiating_Neurons	ENSDARG00000062744	-1.16599	9.28627	6.42955	0.0116931	0.0494738	1.30562	scn1lab	5.07436	5.88882
Differentiating_Neurons	ENSDARG00000025017	-1.15141	9.62362	8.29471	0.00427617	0.0239566	1.62057	prdm8	NA	2.03681
Differentiating_Neurons	ENSDARG00000014018	-1.10058	11.1322	9.45797	0.0023766	0.0162592	1.7889	lhx1a	NA	2.33551
Differentiating_Neurons	ENSDARG00000011870	-1.09582	9.94569	7.77339	0.00569245	0.0296716	1.52766	sp8a	NA	2.11785
Differentiating_Neurons	ENSDARG00000007009	-1.08936	10.4395	7.41889	0.00694161	0.0340618	1.46773	hoxa11b	NA	1.5304
Differentiating_Neurons	ENSDARG00000103743	-1.06849	10.5264	6.84434	0.00947941	0.0428229	1.36832	si:dkeyp-72e1.9	NA	NA
Differentiating_Neurons	ENSDARG00000043727	-1.06089	10.325	7.81932	0.00558927	0.0293488	1.53241	cwc27	-1.13699	-0.922836
Differentiating_Neurons	ENSDARG00000056023	-1.06053	11.1426	6.58806	0.0109499	0.0473608	1.32458	hoxb9a	0.410475	1.01372
Differentiating_Neurons	ENSDARG00000103379	-1.03374	11.6693	11.3332	0.000908235	0.00823196	2.0845	pax6a	0.992519	0.960622
Differentiating_Neurons	ENSDARG00000006010	-1.02677	10.9626	9.52072	0.00229549	0.0157801	1.80189	bmi1a	NA	1.53985
Differentiating_Neurons	ENSDARG00000094992	-1.00659	10.8493	7.57322	0.00641822	0.0321589	1.4927	otx1	NA	-0.119609
Epidermis	ENSDARG00000076472	-4.44697	8.87369	14.526	0.000162446	0.00583429	2.23401	ovol1a	-3.82558	-2.46667
Epidermis	ENSDARG00000019845	-4.41295	8.87507	13.2159	0.000317502	0.00922719	2.03493	pdlim1	2.00781	3.22838
Epidermis	ENSDARG00000059738	-4.3712	8.81753	9.77999	0.00190478	0.0309398	1.50948	ptprsa	-0.447913	0.809035
Epidermis	ENSDARG00000028335	-4.33737	8.83995	12.4456	0.000471581	0.0118962	1.92459	hmga1a	-2.36982	-1.78055
Epidermis	ENSDARG00000040606	-4.30987	9.60976	20.6622	8.13071e-06	0.000633385	3.19833	tfap2c	2.28426	1.89142
Epidermis	ENSDARG00000059279	-4.27084	11.2819	23.5322	2.27129e-06	0.000240643	3.61863	tfap2a	0.136669	1.26784
Epidermis	ENSDARG00000006514	-4.24611	8.76649	10.787	0.00111758	0.0221322	1.65497	her6	-1.17925	1.01623
Epidermis	ENSDARG00000014626	-4.10461	10.0027	20.0783	1.11147e-05	0.000736003	3.13312	dlx3b	NA	1.58068
Epidermis	ENSDARG00000042652	-4.04865	8.62208	10.4904	0.00130213	0.0250838	1.60061	rreb1b	-0.677894	-0.590813
Epidermis	ENSDARG00000012078	-3.97416	10.8297	20.4235	9.78997e-06	0.000669192	3.17445	meis1b	-0.836651	0.188332
Epidermis	ENSDARG00000040777	-3.90147	8.55964	8.68589	0.00339359	0.0450383	1.34642	inhbb	-3.88362	0.00976806
Epidermis	ENSDARG00000036161	-3.89431	8.61505	11.0471	0.000969476	0.0195649	1.70852	hnrnpa0l	NA	-1.66742
Epidermis	ENSDARG00000037108	-3.73317	8.4749	8.69096	0.00338033	0.0450383	1.34642	pfdn6	NA	-4.74495
Epidermis	ENSDARG00000061398	-3.6349	8.46423	8.7392	0.00329217	0.0450072	1.34672	epb41l4b	1.97877	3.14029
Epidermis	ENSDARG00000043130	-3.56473	9.52568	11.7554	0.000693678	0.0154727	1.81043	notch2	1.04089	1.33163
Epidermis	ENSDARG00000090830	-3.5156	8.41747	8.87573	0.00305838	0.042481	1.37181	tmem132e	-1.10472	-0.362726
Epidermis	ENSDARG00000037889	-3.40365	9.01429	11.9606	0.000610373	0.0143798	1.84225	wnt9b	6.3414	6.46496
Epidermis	ENSDARG00000067729	-3.32184	9.99115	8.92997	0.00306729	0.042481	1.37181	arid3c	0.174356	1.61925
Epidermis	ENSDARG00000042151	-3.28285	10.7466	10.1399	0.00164433	0.0286366	1.54308	skia	0.388764	0.352212
Epidermis	ENSDARG00000042725	-3.19757	8.88572	10.0397	0.00166224	0.0286366	1.54308	cebpb	NA	4.42997
Epidermis	ENSDARG00000060845	-2.89744	9.57583	11.5894	0.000755551	0.0158758	1.79926	antxr1d	1.49662	NA
Epidermis	ENSDARG00000016526	-2.78639	10.8788	13.34	0.000320913	0.00922719	2.03493	gata3	-5.71404	-0.910026
Epidermis	ENSDARG00000098240	-2.49089	11.1293	16.2619	7.54288e-05	0.00347465	2.45909	meis2a	-1.02014	-0.163639
Epidermis	ENSDARG00000002937	-2.33826	9.73179	8.99682	0.00294383	0.0415865	1.38105	meis1a	0.871516	2.29855
Epidermis	ENSDARG00000059327	-2.2537	11.5541	10.5387	0.00135267	0.0256387	1.5911	gata2a	-0.940795	-2.49415
Epidermis	ENSDARG00000039412	-2.06246	10.305	12.3058	0.000535123	0.0130336	1.88493	dmrta2	NA	-2.04207
Epidermis	ENSDARG00000034043	-2.05272	10.7575	9.61999	0.00216063	0.033843	1.47053	irx5a	NA	0.0319852
Epidermis	ENSDARG00000023031	-1.974	10.1356	8.93827	0.00306167	0.042481	1.37181	hoxa2b	NA	-2.29396
Epidermis	ENSDARG00000078217	-1.9542	9.33119	8.72158	0.0033767	0.0450383	1.34642	cblc	2.70959	2.86855
Epidermis	ENSDARG00000040926	-1.64269	11.8638	12.9558	0.000396055	0.0104905	1.9792	nr2f2	0.775519	-0.965381
Epidermis	ENSDARG00000061352	-1.6206	11.9411	12.2104	0.000577527	0.0139066	1.85678	bcl11aa	1.80578	1.53657
Epidermis	ENSDARG00000056979	-1.40267	10.5039	9.60406	0.00217208	0.033843	1.47053	lhx9	-4.53897	-4.5647
Fast_Muscle	ENSDARG00000023031	-6.17242	10.1356	28.5977	2.03002e-07	5.37702e-05	4.26946	hoxa2b	NA	-0.145179
Fast_Muscle	ENSDARG00000030633	-5.22777	9.36322	10.0495	0.00168289	0.0342889	1.46485	plekhm3	0.617441	-0.0220903
Fast_Muscle	ENSDARG00000037116	-4.79913	9.09234	11.8378	0.000654981	0.0180247	1.74413	cxcl12a	-0.55466	-0.749825
Fast_Muscle	ENSDARG00000056819	-4.74827	10.2379	24.175	1.61232e-06	0.000227766	3.64251	hoxa9b	NA	-0.659865
Fast_Muscle	ENSDARG00000030110	-4.70116	9.04099	13.2903	0.00030876	0.0110892	1.9551	myod1	NA	4.26064
Fast_Muscle	ENSDARG00000070107	-4.64783	9.00176	12.6755	0.000422838	0.0131764	1.8802	six7	-4.55684	-4.62855
Fast_Muscle	ENSDARG00000115868	-4.564	8.94278	9.69485	0.00200041	0.037847	1.42197	sp5l	NA	-3.8817
Fast_Muscle	ENSDARG00000056438	-4.56281	8.95376	10.3649	0.00140469	0.0310056	1.50856	her9	1.04407	1.47251
Fast_Muscle	ENSDARG00000031983	-4.53135	10.0748	19.9622	1.19349e-05	0.000936666	3.02842	six4b	1.64087	1.37246
Fast_Muscle	ENSDARG00000071497	-4.33533	9.95855	17.2062	4.54966e-05	0.0026056	2.58409	zic3	-3.22758	-1.61759
Fast_Muscle	ENSDARG00000045893	-4.3197	8.80149	10.1627	0.00155522	0.0329552	1.48208	kctd15a	-2.89283	-3.46994
Fast_Muscle	ENSDARG00000102824	-4.00998	9.67314	14.5821	0.000165678	0.00688115	2.16234	pcdh10b	-2.65475	-7.27935
Fast_Muscle	ENSDARG00000033683	-3.83751	9.53972	13.7727	0.000247785	0.00921153	2.03567	tpma	6.92308	7.35108
Fast_Muscle	ENSDARG00000004695	-3.76402	9.53835	12.7282	0.000421866	0.0131764	1.8802	six4a	2.50778	2.99112
Fast_Muscle	ENSDARG00000011579	-3.6848	10.3473	19.6489	1.39796e-05	0.00102148	2.99077	hoxb10a	NA	0.190111
Fast_Muscle	ENSDARG00000054030	-3.65054	9.95487	15.1976	0.000122878	0.00566039	2.24715	hoxb5b	NA	-2.21885
Fast_Muscle	ENSDARG00000070339	-3.53416	13.2956	27.9967	3.06045e-07	6.4851e-05	4.18808	hoxc3a	0.130893	-1.23515
Fast_Muscle	ENSDARG00000039806	-3.38432	9.23425	11.0728	0.000979142	0.0247	1.6073	tbxtb	-1.4801	-5.20356
Fast_Muscle	ENSDARG00000056023	-3.36474	10.9841	20.5524	9.2797e-06	0.000795294	3.09947	hoxb9a	0.448776	-1.1344
Fast_Muscle	ENSDARG00000059274	-3.34129	10.2153	15.3932	0.00011234	0.0054102	2.26679	hoxd9a	NA	0.890549
Fast_Muscle	ENSDARG00000030402	-3.29876	9.67143	11.8408	0.000667314	0.0181287	1.74163	twist1a	NA	-2.88339
Fast_Muscle	ENSDARG00000052695	-3.28673	11.1352	15.074	0.000135148	0.00589637	2.22942	nr2f1a	-2.05322	-1.24609
Fast_Muscle	ENSDARG00000002336	-3.23377	9.59249	10.3613	0.0014344	0.0310271	1.50826	dlc	-0.82285	-0.0882448
Fast_Muscle	ENSDARG00000056030	-3.22384	10.4557	14.5931	0.000168862	0.00688115	2.16234	hoxb7a	-0.547568	-2.27036
Fast_Muscle	ENSDARG00000037760	-3.10079	10.7674	32.3185	3.8167e-08	1.45276e-05	4.83781	uncx4.1	NA	2.868
Fast_Muscle	ENSDARG00000056027	-3.04545	10.6743	13.054	0.000368484	0.0120126	1.92036	hoxb8a	NA	-2.79351
Fast_Muscle	ENSDARG00000103862	-2.99798	12.3102	24.4031	1.57752e-06	0.000227766	3.64251	hoxa4a	0.509455	0.0991687
Fast_Muscle	ENSDARG00000073869	-2.96058	11.303	10.5768	0.00132083	0.0297748	1.52615	pdzrn3b	0.45266	0.307011
Fast_Muscle	ENSDARG00000056856	-2.94936	12.8141	36.1535	7.98051e-09	8.45535e-06	5.07287	tax1bp1b	0.978792	0.325885
Fast_Muscle	ENSDARG00000031337	-2.91421	10.363	14.9223	0.000142734	0.00604908	2.21831	hoxa10b	NA	1.70441
Fast_Muscle	ENSDARG00000025131	-2.90675	10.9837	21.035	7.3804e-06	0.000710866	3.14821	lbx2	NA	1.44125
Fast_Muscle	ENSDARG00000026513	-2.86212	9.7043	10.4534	0.00136946	0.0305463	1.51504	hoxb6b	NA	-0.0465242
Fast_Muscle	ENSDARG00000029263	-2.71534	13.7548	20.4798	1.01567e-05	0.000827773	3.08209	hoxb3a	-1.47486	-0.913319
Fast_Muscle	ENSDARG00000055554	-2.71241	9.6064	9.79808	0.00192598	0.0371014	1.43061	wnt1	NA	-1.56467
Fast_Muscle	ENSDARG00000101954	-2.70391	10.2851	11.9677	0.000634905	0.017997	1.7448	hoxc6b	-1.11006	-0.955141
Fast_Muscle	ENSDARG00000022418	-2.67903	10.776	9.80771	0.00195711	0.0373613	1.42758	faf1	-0.200675	0.451514
Fast_Muscle	ENSDARG00000026473	-2.60763	10.5538	14.3617	0.000190215	0.00747834	2.1262	six1b	NA	1.22903
Fast_Muscle	ENSDARG00000010192	-2.52976	11.3316	16.3858	7.12199e-05	0.00386961	2.41233	pax3a	-2.20978	-1.65555
Fast_Muscle	ENSDARG00000057859	-2.36074	10.5323	11.9736	0.000636988	0.017997	1.7448	hoxd10a	NA	0.860813
Fast_Muscle	ENSDARG00000091481	-2.33593	10.3364	10.1015	0.00166768	0.0342889	1.46485	foxc1a	NA	-1.69118
Fast_Muscle	ENSDARG00000059280	-2.20251	12.0807	12.1143	0.000606543	0.0178509	1.74834	hoxd3a	0.305594	-0.895308
Fast_Muscle	ENSDARG00000103743	-2.17087	10.3765	10.5889	0.00129523	0.0295119	1.53	si:dkeyp-72e1.9	-0.741827	-2.60968
Fast_Muscle	ENSDARG00000032578	-2.07702	10.455	12.9407	0.00038885	0.0124844	1.90363	pax2b	-1.99694	-2.89638
Fast_Muscle	ENSDARG00000058133	-1.81506	10.3218	9.84424	0.00190801	0.0370924	1.43071	foxd2	NA	-1.90754
Fast_Muscle	ENSDARG00000100398	-1.70575	11.7986	13.2301	0.000344728	0.0115949	1.93573	pax7a	0.715335	0.710004
Fast_Muscle	ENSDARG00000070818	-1.69594	12.1386	10.6587	0.00127689	0.0294102	1.5315	pax7b	-1.44413	-2.17157
Fast_Muscle	ENSDARG00000031307	-1.50991	11.0868	9.71335	0.00206656	0.0387525	1.4117	zic4	NA	1.42198
Fast_Muscle	ENSDARG00000070348	-1.33496	13.4215	11.7505	0.000733809	0.0196828	1.70591	hoxc10a	0.48357	1.54448
Endothelial_Cell	ENSDARG00000054632	-4.52773	11.1168	19.8986	1.21983e-05	0.00159985	2.79592	fli1a	5.06598	6.31372
Endothelial_Cell	ENSDARG00000019930	-4.4527	10.3151	15.6149	9.8774e-05	0.00863639	2.06367	tal1	1.28535	3.89525
Endothelial_Cell	ENSDARG00000017121	-3.70704	10.3231	12.4003	0.000501938	0.0316965	1.49899	mafba	NA	3.21449
Endothelial_Cell	ENSDARG00000063908	-3.66819	10.2549	11.4401	0.000821571	0.0466926	1.33075	mt-co2	NA	0.0807611
