# Supplementary material for: Single-cell co-mapping reveals relationship between chromatin state and gene expression in early zebrafish development
Source: eLife. 2026 Apr 21;15:RP110400. doi: 10.7554/eLife.110400 (PMC13099137; doi:10.7554/eLife.110400)
Supplement: Supplementary file 4. [file elife-110400-supp4.xlsx]

## Sheet: Table-4_TF_classification
motif	TF	Prediction_Rsq	Inferred_activity	Germlayer_activity	Epigenetic_regulation	Top_TF	Pvalue_permutation	Padjusted
arid3a+arid3b+arid3c	arid3a	0.723032	Activator	Specific	Regulated	FALSE	0	0
arid3a+arid3b+arid3c	arid3b	0.723032	Activator	Specific	Regulated	FALSE	0	0
arid3a+arid3b+arid3c	arid3c	0.723032	Repressor	Specific	Regulated	TRUE	0	0
arid5a+arid6+zgc:77151	zgc:77151	0.573678	Activator	Specific	Regulated	TRUE	0	0
arnt2	arnt2	0.383577	Repressor	Specific	Regulated	TRUE	0	0
atf3	atf3	0.718351	Repressor	Specific	Independent	TRUE	0	0
BX548076.1+CR388055.1+cuedc1b+med22+si:dkey-56d12.4+zfhx3+zfhx3a+zfhx4	cuedc1b	0.621348	None	Specific	Regulated	FALSE	0	0
BX548076.1+CR388055.1+cuedc1b+med22+si:dkey-56d12.4+zfhx3+zfhx3a+zfhx4	med22	0.621348	Activator	Specific	Regulated	FALSE	0	0
BX548076.1+CR388055.1+cuedc1b+med22+si:dkey-56d12.4+zfhx3+zfhx3a+zfhx4	zfhx3	0.621348	Repressor	Specific	Regulated	TRUE	0	0
BX548076.1+CR388055.1+cuedc1b+med22+si:dkey-56d12.4+zfhx3+zfhx3a+zfhx4	zfhx4	0.621348	Repressor	Specific	Regulated	FALSE	0	0
CABZ01080371.1+pou2f1b	CABZ01080371.1	0.538156	Activator	Specific	Regulated	TRUE	0	0
CABZ01090890.1+atf6	atf6	0.526395	Activator	Specific	Independent	TRUE	0	0
cdc5l	cdc5l	0.556212	Activator	Specific	Regulated	TRUE	0	0
cdx1a+cdx1b+ved	cdx1a	0.467406	Activator	Specific	Regulated	TRUE	0	0
cdx1a+cdx1b+ved	ved	0.467406	None	Specific	Regulated	FALSE	0	0
clocka+clockb+npas2	clocka	0.426039	Repressor	Specific	Independent	FALSE	0	0
clocka+clockb+npas2	clockb	0.426039	Repressor	Specific	Regulated	TRUE	0	0
clocka+clockb+npas2	npas2	0.426039	Repressor	Specific	Independent	FALSE	0	0
creb1a+creb1b+crema+cremb	creb1a	0.568542	Activator	Specific	Regulated	TRUE	0	0
creb1a+creb1b+crema+cremb	creb1b	0.568542	Repressor	Specific	Regulated	FALSE	0	0
creb1a+creb1b+crema+cremb	crema	0.568542	None	Specific	Regulated	FALSE	0	0
CT573494.3+tead1a	tead1a	0.673702	Repressor	Specific	Regulated	TRUE	0	0
ctcf	ctcf	0.642697	Activator	Specific	Independent	TRUE	0	0
cux1a	cux1a	0.584843	Repressor	Specific	Independent	TRUE	0	0
cxxc1a+cxxc1b+mbd1a+mbd1b	cxxc1a	0.578145	None	Specific	Regulated	FALSE	0	0
cxxc1a+cxxc1b+mbd1a+mbd1b	cxxc1b	0.578145	Activator	Specific	Regulated	TRUE	0	0
cxxc1a+cxxc1b+mbd1a+mbd1b	mbd1a	0.578145	Repressor	Specific	Regulated	FALSE	0	0
cxxc1a+cxxc1b+mbd1a+mbd1b	mbd1b	0.578145	None	Specific	Regulated	FALSE	0	0
dlx3b	dlx3b	0.135592	None	Specific	Regulated	TRUE	0.01	0.0104369
dmbx1a+dmbx1b	dmbx1a	0.352405	None	Specific	Regulated	FALSE	0	0
dmbx1a+dmbx1b	dmbx1b	0.352405	Activator	Specific	Regulated	TRUE	0	0
e2f3	e2f3	0.524201	Repressor	Specific	Independent	TRUE	0	0
e2f4	e2f4	0.415768	Repressor	Specific	Independent	TRUE	0	0
e2f7	e2f7	0.610696	None	Specific	Regulated	TRUE	0	0
e2f8	e2f8	0.294093	Repressor	Specific	Independent	TRUE	0	0
elf1	elf1	0.475263	Repressor	Specific	Independent	TRUE	0	0
elf2a+elf2b	elf2a	0.691101	Repressor	Specific	Regulated	TRUE	0	0
elf2a+elf2b	elf2b	0.691101	Activator	Specific	Independent	FALSE	0	0
erf+erfl3	erf	0.593756	Activator	Specific	Regulated	FALSE	0	0
erf+erfl3	erfl3	0.593756	Repressor	Specific	Regulated	TRUE	0	0
ets2	ets2	0.285984	Repressor	Specific	Regulated	TRUE	0	0
etv4	etv4	0.57627	Activator	Specific	Independent	TRUE	0	0
etv5a+etv5b	etv5a	0.697444	Activator	Specific	Regulated	FALSE	0	0
etv5a+etv5b	etv5b	0.697444	Activator	Specific	Regulated	TRUE	0	0
FO834857.1	FO834857.1	0.429267	Activator	Specific	Independent	TRUE	0	0
fosaa+fosab+fosl1a	fosaa	0.66824	Repressor	Specific	Regulated	TRUE	0	0
fosaa+fosab+fosl1a	fosab	0.66824	Activator	Specific	Regulated	FALSE	0	0
fosaa+fosab+fosl1a	fosl1a	0.66824	Repressor	Specific	Regulated	FALSE	0	0
foxa	foxa	0.589223	Activator	Specific	Regulated	TRUE	0	0
foxa2	foxa2	0.534339	Activator	Specific	Regulated	TRUE	0	0
foxa3	foxa3	0.666761	Activator	Specific	Regulated	TRUE	0	0
foxc1a+foxc1b	foxc1a	0.619458	Repressor	Specific	Independent	TRUE	0	0
foxh1+foxq1a+foxq1b+imp3	foxh1	0.603281	Activator	Specific	Regulated	TRUE	0	0
foxo3b+foxo6a+foxo6b	foxo3b	0.580623	Activator	Specific	Regulated	TRUE	0	0
foxo3b+foxo6a+foxo6b	foxo6b	0.580623	None	Specific	Regulated	FALSE	0	0
foxo4	foxo4	0.712839	Repressor	Specific	Independent	TRUE	0	0
foxp1a+foxp1b+foxp3a	foxp1a	0.46533	Repressor	Specific	Regulated	TRUE	0	0
foxp1a+foxp1b+foxp3a	foxp1b	0.46533	Repressor	Specific	Regulated	FALSE	0	0
gabpa	gabpa	0.62375	Activator	Specific	Regulated	TRUE	0	0
gata1b+gata2a	gata2a	0.413802	Activator	Specific	Regulated	TRUE	0	0
gata3	gata3	0.197515	Activator	Specific	Regulated	TRUE	0	0
gata5	gata5	0.364365	Repressor	Specific	Independent	TRUE	0	0
gata6	gata6	0.123074	Activator	Specific	Regulated	TRUE	0.02	0.0206731
gbx1	gbx1	0.0983683	Repressor	Specific	Regulated	TRUE	0.05	0.0511905
gli2a+gli3	gli2a	0.369181	Repressor	Specific	Regulated	TRUE	0	0
gli2a+gli3	gli3	0.369181	Repressor	Specific	Independent	FALSE	0	0
her1+her11+her5	her1	0.301825	Repressor	Specific	Regulated	TRUE	0	0
her6+her8.2+her9	her6	0.149543	Repressor	Specific	Regulated	FALSE	0.01	0.0104369
her6+her8.2+her9	her9	0.149543	Repressor	Specific	Independent	TRUE	0.01	0.0104369
hey1+heyl	hey1	0.513357	None	Specific	Regulated	TRUE	0	0
hic1l+hic2	hic1l	0.337904	Activator	Specific	Independent	TRUE	0	0
hic1l+hic2	hic2	0.337904	Repressor	Specific	Regulated	FALSE	0	0
hmga1a	hmga1a	0.738455	Repressor	Specific	Regulated	TRUE	0	0
hnf1ba+hnf1bb	hnf1ba	0.472082	None	Specific	Regulated	TRUE	0	0
homeza+homezb+pgm3	homeza	0.470089	Repressor	Specific	Independent	FALSE	0	0
homeza+homezb+pgm3	homezb	0.470089	Repressor	Specific	Regulated	TRUE	0	0
hoxa4a+hoxc3a	hoxa4a	0.344534	Activator	Specific	Regulated	TRUE	0	0
hoxa4a+hoxc3a	hoxc3a	0.344534	None	Specific	Regulated	FALSE	0	0
hoxb3a	hoxb3a	0.494216	Repressor	Specific	Regulated	TRUE	0	0
hoxb5a+hoxb5b	hoxb5b	0.401369	Repressor	Specific	Independent	TRUE	0	0
hoxb9a	hoxb9a	0.649067	Repressor	Specific	Regulated	TRUE	0	0
hoxc6a+hoxc6b	hoxc6b	0.67674	Repressor	Specific	Independent	TRUE	0	0
irx1b+irx4a+irx4b	irx1b	0.628419	None	Specific	Regulated	TRUE	0	0
irx3a+irx3b	irx3a	0.690555	Repressor	Specific	Regulated	TRUE	0	0
klf13+zgc:153115	klf13	0.609516	Repressor	Specific	Independent	TRUE	0	0
klf13+zgc:153115	zgc:153115	0.609516	Repressor	Specific	Independent	FALSE	0	0
klf5l+klf6a+klf6b	klf5l	0.308289	Repressor	Specific	Regulated	TRUE	0	0
klf5l+klf6a+klf6b	klf6a	0.308289	Activator	Specific	Regulated	FALSE	0	0
lhx1a+lhx1b	lhx1a	0.667666	None	Specific	Regulated	TRUE	0	0
lhx2b+lhx9	lhx2b	0.686517	Repressor	Specific	Independent	FALSE	0	0
lhx2b+lhx9	lhx9	0.686517	Activator	Specific	Independent	TRUE	0	0
lhx5	lhx5	0.550005	Activator	Specific	Regulated	TRUE	0	0
mecom+rlf+sinhcafl	mecom	0.218681	Repressor	Specific	Independent	FALSE	0.01	0.0104369
mecom+rlf+sinhcafl	rlf	0.218681	Repressor	Specific	Independent	FALSE	0.01	0.0104369
mecom+rlf+sinhcafl	sinhcafl	0.218681	Repressor	Specific	Regulated	TRUE	0.01	0.0104369
mef2d	mef2d	0.713652	Repressor	Specific	Independent	TRUE	0	0
meis1a+meis1b	meis1a	0.422462	Activator	Specific	Regulated	FALSE	0	0
meis1a+meis1b	meis1b	0.422462	Repressor	Specific	Regulated	TRUE	0	0
meis2a+meis2b	meis2a	0.199908	None	Specific	Regulated	TRUE	0.01	0.0104369
meis3	meis3	0.152374	Repressor	Specific	Regulated	TRUE	0	0
mgaa	mgaa	0.670609	Activator	Specific	Regulated	TRUE	0	0
mixl1+mxtx1+sebox	mixl1	0.520939	None	Specific	Regulated	TRUE	0	0
mnta+mntb	mnta	0.406363	Activator	Specific	Regulated	TRUE	0	0
mnta+mntb	mntb	0.406363	Activator	Specific	Regulated	FALSE	0	0
msx1b+msx3	msx1b	0.396967	Repressor	Specific	Regulated	TRUE	0	0
mta3	mta3	0.621004	Activator	Specific	Independent	TRUE	0	0
mxi1	mxi1	0.390016	Repressor	Specific	Independent	TRUE	0	0
mybl2a	mybl2a	0.127336	None	Specific	Regulated	TRUE	0.05	0.0511905
mybl2b	mybl2b	0.724952	Repressor	Specific	Independent	TRUE	0	0
myca+mych	mych	0.479248	Activator	Specific	Regulated	TRUE	0	0
mycn	mycn	0.530424	Repressor	Specific	Regulated	TRUE	0	0
nfat5a+nfat5b	nfat5a	0.472964	Repressor	Specific	Regulated	FALSE	0	0
nfat5a+nfat5b	nfat5b	0.472964	Activator	Specific	Independent	TRUE	0	0
nfil3-5+nfil3-6+si:dkey-60d5.3	nfil3-5	0.61866	Repressor	Specific	Regulated	TRUE	0	0
nr2f1b+nr2f5	nr2f5	0.128614	Activator	Specific	Regulated	TRUE	0.01	0.0104369
nr2f2	nr2f2	0.358461	Activator	Specific	Regulated	TRUE	0	0
nr2f6a+nr2f6b	nr2f6a	0.408486	Repressor	Specific	Regulated	FALSE	0	0
nr2f6a+nr2f6b	nr2f6b	0.408486	Activator	Specific	Regulated	TRUE	0	0
nr6a1a	nr6a1a	0.588472	Repressor	Specific	Independent	TRUE	0	0
osr1	osr1	0.410582	Repressor	Specific	Regulated	TRUE	0	0
otx1	otx1	0.597758	Activator	Specific	Regulated	TRUE	0	0
otx2a	otx2a	0.556982	Activator	Specific	Regulated	TRUE	0	0
otx2b	otx2b	0.480166	Activator	Specific	Regulated	TRUE	0	0
patz1	patz1	0.637447	Repressor	Specific	Regulated	TRUE	0	0
pax10+pax4+pax6a+pax6b	pax6a	0.771553	Activator	Specific	Regulated	TRUE	0	0
pax10+pax4+pax6a+pax6b	pax6b	0.771553	Repressor	Specific	Regulated	FALSE	0	0
pax2a+pax5	pax2a	0.43403	Activator	Specific	Regulated	FALSE	0	0
pax2a+pax5	pax5	0.43403	Repressor	Specific	Regulated	TRUE	0	0
pax3a+pax3b	pax3a	0.563145	Repressor	Specific	Independent	FALSE	0	0
pax3a+pax3b	pax3b	0.563145	Repressor	Specific	Independent	TRUE	0	0
pbx4	pbx4	0.470163	Activator	Specific	Regulated	TRUE	0	0
phox2a	phox2a	0.417664	Activator	Specific	Regulated	TRUE	0	0
pitx2	pitx2	0.368179	Repressor	Specific	Regulated	TRUE	0	0
pknox1.1+pknox1.2	pknox1.1	0.237233	None	Specific	Regulated	FALSE	0	0
pknox1.1+pknox1.2	pknox1.2	0.237233	Activator	Specific	Regulated	TRUE	0	0
plag1+plagx	plagx	0.353653	Repressor	Specific	Independent	TRUE	0	0
pou3f2a+pou3f2b+pou3f3a+pou3f3b	pou3f2b	0.691877	Repressor	Specific	Regulated	TRUE	0	0
pou5f3	pou5f3	0.782484	Activator	Specific	Regulated	TRUE	0	0
prdm1a	prdm1a	0.413391	None	Specific	Regulated	TRUE	0	0
rarga	rarga	0.303656	Activator	Specific	Regulated	TRUE	0	0
rcor1	rcor1	0.384385	Activator	Specific	Regulated	TRUE	0	0
rfx2+rfx4	rfx2	0.154173	Repressor	Specific	Regulated	FALSE	0.01	0.0104369
rfx2+rfx4	rfx4	0.154173	Activator	Specific	Regulated	TRUE	0.01	0.0104369
rfx5	rfx5	0.370775	Repressor	Specific	Regulated	TRUE	0	0
rfx7a+rfx7b	rfx7a	0.209174	Repressor	Specific	Independent	FALSE	0	0
rfx7a+rfx7b	rfx7b	0.209174	Repressor	Specific	Independent	TRUE	0	0
rreb1a+rreb1b+znf598	rreb1a	0.227595	Repressor	Specific	Regulated	TRUE	0	0
rreb1a+rreb1b+znf598	rreb1b	0.227595	Activator	Specific	Regulated	FALSE	0	0
rreb1a+rreb1b+znf598	znf598	0.227595	Repressor	Specific	Regulated	FALSE	0	0
rsl1d1+sp3a	rsl1d1	0.351768	Repressor	Specific	Regulated	FALSE	0	0
rsl1d1+sp3a	sp3a	0.351768	Repressor	Specific	Regulated	TRUE	0	0
rxraa+rxrab+rxrba+rxrgb	rxraa	0.302527	None	Specific	Regulated	FALSE	0	0
rxraa+rxrab+rxrba+rxrgb	rxrba	0.302527	Repressor	Specific	Regulated	FALSE	0	0
rxraa+rxrab+rxrba+rxrgb	rxrgb	0.302527	Activator	Specific	Regulated	TRUE	0	0
six1a+six2a+six2b+six5+six9	six5	0.323746	Repressor	Specific	Independent	TRUE	0	0
six1b	six1b	0.395752	Activator	Specific	Independent	TRUE	0	0
six3a+six3b+six7	six7	0.307342	Repressor	Specific	Independent	TRUE	0	0
six4a+six4b	six4a	0.163578	Repressor	Specific	Independent	TRUE	0	0
six4a+six4b	six4b	0.163578	Repressor	Specific	Independent	FALSE	0	0
smad1	smad1	0.429289	Repressor	Specific	Regulated	TRUE	0	0
snai1a	snai1a	0.404992	Repressor	Specific	Regulated	TRUE	0	0
sox13	sox13	0.780249	None	Specific	Regulated	TRUE	0	0
sox19a+sox19b+sox3	sox19a	0.461047	Activator	Specific	Regulated	TRUE	0	0
sox19a+sox19b+sox3	sox19b	0.461047	None	Specific	Regulated	FALSE	0	0
sox5	sox5	0.684839	Repressor	Specific	Regulated	TRUE	0	0
sox9a+sox9b	sox9a	0.430026	Repressor	Specific	Regulated	FALSE	0	0
sox9a+sox9b	sox9b	0.430026	Repressor	Specific	Regulated	TRUE	0	0
tbp	tbp	0.5468	Activator	Specific	Regulated	TRUE	0	0
tbx16+tbx16l+tbx2a+tbx2b	tbx16	0.777445	Activator	Specific	Regulated	TRUE	0	0
tbx16+tbx16l+tbx2a+tbx2b	tbx16l	0.777445	Repressor	Specific	Regulated	FALSE	0	0
tbx16+tbx16l+tbx2a+tbx2b	tbx2a	0.777445	Activator	Specific	Regulated	FALSE	0	0
tbx16+tbx16l+tbx2a+tbx2b	tbx2b	0.777445	Repressor	Specific	Regulated	FALSE	0	0
tbxta+tbxtb	tbxta	0.671107	Activator	Specific	Regulated	TRUE	0	0
tbxta+tbxtb	tbxtb	0.671107	Activator	Specific	Regulated	FALSE	0	0
tcf12	tcf12	0.166058	None	Specific	Regulated	TRUE	0.01	0.0104369
tcf3a+tcf3b	tcf3a	0.274937	Activator	Specific	Regulated	TRUE	0	0
tcf3a+tcf3b	tcf3b	0.274937	None	Specific	Regulated	FALSE	0	0
tcf7l1a+tcf7l1b+tcf7l2	tcf7l1a	0.784727	Repressor	Specific	Regulated	TRUE	0	0
tcf7l1a+tcf7l1b+tcf7l2	tcf7l1b	0.784727	Repressor	Specific	Regulated	FALSE	0	0
tcf7l1a+tcf7l1b+tcf7l2	tcf7l2	0.784727	Activator	Specific	Regulated	FALSE	0	0
tead1b	tead1b	0.437792	Activator	Specific	Regulated	TRUE	0	0
tead3a+tead3b	tead3a	0.600055	Activator	Specific	Regulated	TRUE	0	0
tead3a+tead3b	tead3b	0.600055	Activator	Specific	Regulated	FALSE	0	0
tfap2a+tfap2c	tfap2a	0.660717	Activator	Specific	Regulated	TRUE	0	0
tfap2a+tfap2c	tfap2c	0.660717	Activator	Specific	Regulated	FALSE	0	0
tfap4	tfap4	0.292612	Repressor	Specific	Regulated	TRUE	0	0
tfdp1a+tfdp1b	tfdp1a	0.70064	Activator	Specific	Regulated	FALSE	0	0
tfdp1a+tfdp1b	tfdp1b	0.70064	Activator	Specific	Regulated	TRUE	0	0
tgif1	tgif1	0.385129	Repressor	Specific	Independent	TRUE	0	0
tp63	tp63	0.139844	Repressor	Specific	Independent	TRUE	0.02	0.0206731
usf2	usf2	0.568514	Activator	Specific	Regulated	TRUE	0	0
vox	vox	0.510928	Repressor	Specific	Independent	TRUE	0	0
xbp1	xbp1	0.483538	Repressor	Specific	Independent	TRUE	0	0
ybx1	ybx1	0.720873	Repressor	Specific	Independent	TRUE	0	0
yy1a+yy1b	yy1a	0.328348	Repressor	Specific	Regulated	TRUE	0	0
yy1a+yy1b	yy1b	0.328348	None	Specific	Regulated	FALSE	0	0
zbtb16a+zbtb16b	zbtb16a	0.838175	Repressor	Specific	Regulated	TRUE	0	0
zbtb16a+zbtb16b	zbtb16b	0.838175	Repressor	Specific	Regulated	FALSE	0	0
zbtb18+zbtb42	zbtb18	0.385515	Activator	Specific	Regulated	TRUE	0	0
zbtb18+zbtb42	zbtb42	0.385515	None	Specific	Regulated	FALSE	0	0
zeb1a+zeb1b	zeb1a	0.683284	Activator	Specific	Regulated	FALSE	0	0
zeb1a+zeb1b	zeb1b	0.683284	Repressor	Specific	Regulated	TRUE	0	0
zgc:161969	zgc:161969	0.613772	Repressor	Specific	Regulated	TRUE	0	0
zic1	zic1	0.506334	Activator	Specific	Regulated	TRUE	0	0
znf384l	znf384l	0.333174	None	Specific	Regulated	TRUE	0	0
znf740a+znf740b	znf740a	0.573043	Repressor	Specific	Regulated	FALSE	0	0
znf740a+znf740b	znf740b	0.573043	Repressor	Specific	Regulated	TRUE	0	0
atf4a+atf4b	atf4a	0.523224	None	Unspecific	Regulated	FALSE	0	0
atf4a+atf4b	atf4b	0.523224	Repressor	Unspecific	Regulated	TRUE	0	0
her12+her15.1+her15.2+her2+her4.1+her4.2+her4.3+her4.4	her12	0.0628134	None	Unspecific	Regulated	FALSE	0.1	0.1
her12+her15.1+her15.2+her2+her4.1+her4.2+her4.3+her4.4	her15.1	0.0628134	Repressor	Unspecific	Regulated	TRUE	0.1	0.1
her12+her15.1+her15.2+her2+her4.1+her4.2+her4.3+her4.4	her2	0.0628134	Repressor	Unspecific	Regulated	FALSE	0.1	0.1
her12+her15.1+her15.2+her2+her4.1+her4.2+her4.3+her4.4	her4.1	0.0628134	None	Unspecific	Regulated	FALSE	0.1	0.1
her12+her15.1+her15.2+her2+her4.1+her4.2+her4.3+her4.4	her4.2	0.0628134	Activator	Unspecific	Regulated	FALSE	0.1	0.1
smad2	smad2	0.30753	None	Unspecific	Independent	TRUE	0	0
